# Supplementary material for: DNA Interactions and Biological Activity of 2,9-Disubstituted 1,10-Phenanthroline Thiosemicarbazone-Based Ligands and a 4-Phenylthiazole Derivative
Source: MDPI journal article supplement (doi:10.3390/biology13010060), 2024-01-20
Supplement: s1 [file s1]

# DNA interactions and biological activity of 2,9-disubstituted 1,10-phenanthroline thiosemicarbazone-based ligands and a 4-phenylthiazole derivative

Álvaro Nicolás,<sup>a,b</sup> Julia G. Quero,<sup>a</sup> Marta Barroso,<sup>a</sup> Zoila Gándara,<sup>a,b\*</sup> and Lourdes Gude<sup>a,b\*</sup>

<sup>a</sup>Universidad de Alcalá, Departamento de Química Orgánica y Química Inorgánica, Instituto de Investigación Química “Andrés M. del Río” (IQAR), 28805-Alcalá de Henares, Madrid, Spain.

<sup>b</sup>Grupo DISCOBAC, Instituto de Investigación Sanitaria de Castilla-La Mancha (IDISCAM), Spain.

|                                                                                                                                                                                   |                  |
|-----------------------------------------------------------------------------------------------------------------------------------------------------------------------------------|------------------|
| <sup>1</sup> H, <sup>13</sup> C, <sup>1</sup> H- <sup>1</sup> H-COSY, <sup>1</sup> H- <sup>13</sup> C-HSQC and <sup>1</sup> H- <sup>13</sup> C-HMBC NMR spectra of <b>1</b> ..... | Figures S1-S5    |
| <sup>1</sup> H, <sup>13</sup> C, <sup>19</sup> F and <sup>31</sup> P NMR spectra of <b>2</b> .....                                                                                | Figures S6-S9    |
| <sup>1</sup> H, <sup>13</sup> C and <sup>19</sup> F spectra of <b>3</b> .....                                                                                                     | Figures S10-S12  |
| <sup>1</sup> H and <sup>13</sup> C NMR spectra of <b>4</b> .....                                                                                                                  | Figures S13, S14 |
| Zoomed view of high-resolution electrospray ionization mass spectrum (ESI-HRMS-pos) of <b>1</b> (MeOH, 1% formic acid) .....                                                      | Figure S15       |
| Zoomed view of high-resolution electrospray ionization mass spectrum (ESI-HRMS-pos) of <b>2</b> (MeOH, 1% formic acid).....                                                       | Figure S16       |
| High-resolution electrospray ionization mass spectrum (ESI-HRMS-pos) of <b>3</b> (MeOH, 1% formic acid).....                                                                      | Figure S17       |
| Zoomed view of high-resolution electrospray ionization mass spectrum (ESI-HRMS-pos) of <b>4</b> (MeOH, 1% formic acid).....                                                       | Figure S18       |
| Cell cycle assay histograms obtained by flow cytometry in HeLa cells treated with <b>1</b> or <b>2</b> (1/2 IC <sub>50</sub> concentrations, 72 h).....                           | Figure S19       |

DMSO-d<sub>6</sub>

— 11.99

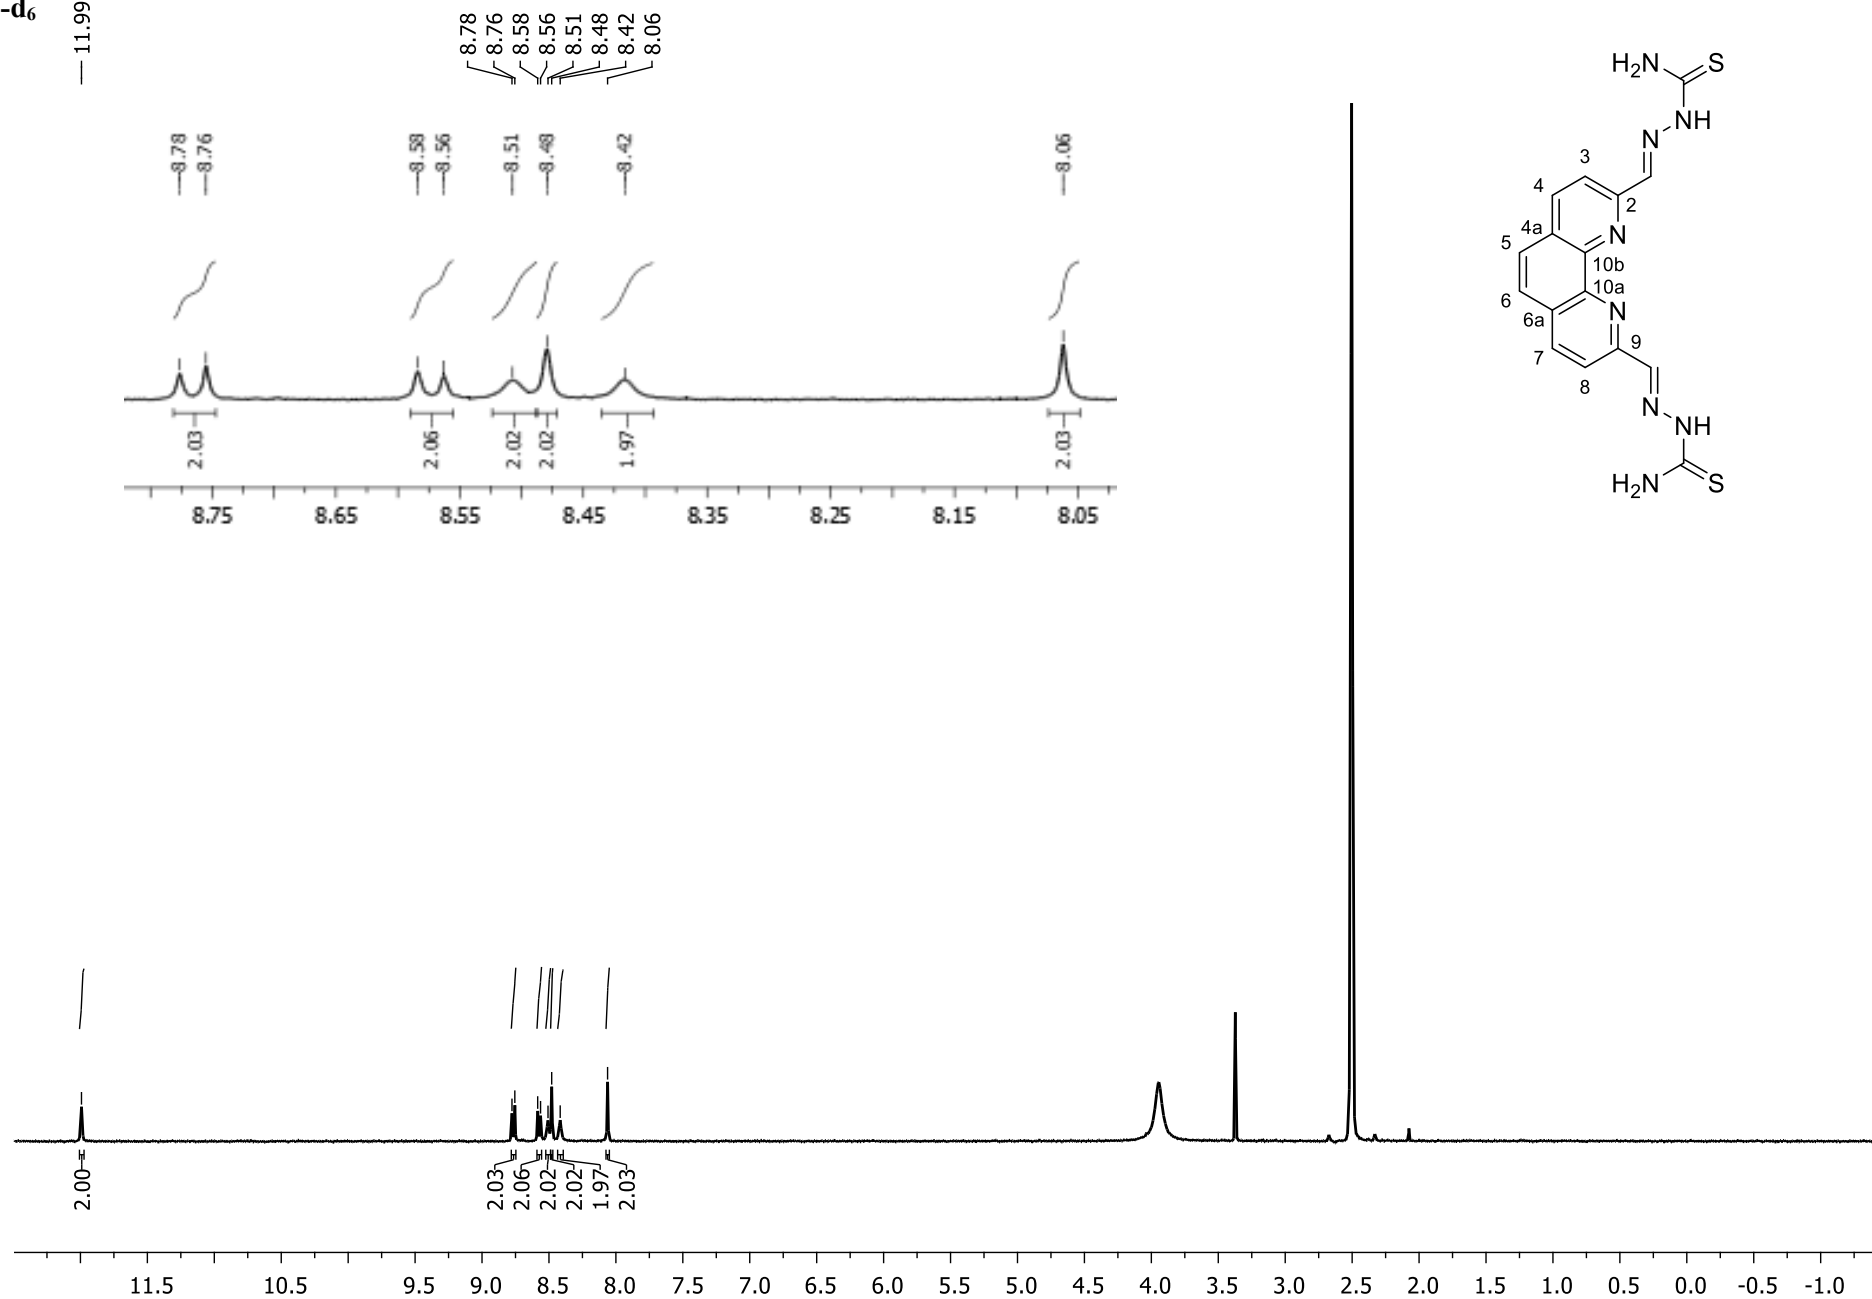

**Figure S1.** <sup>1</sup>H NMR (400 MHz, DMSO-d<sub>6</sub>) of **1**

DMSO-d<sub>6</sub>

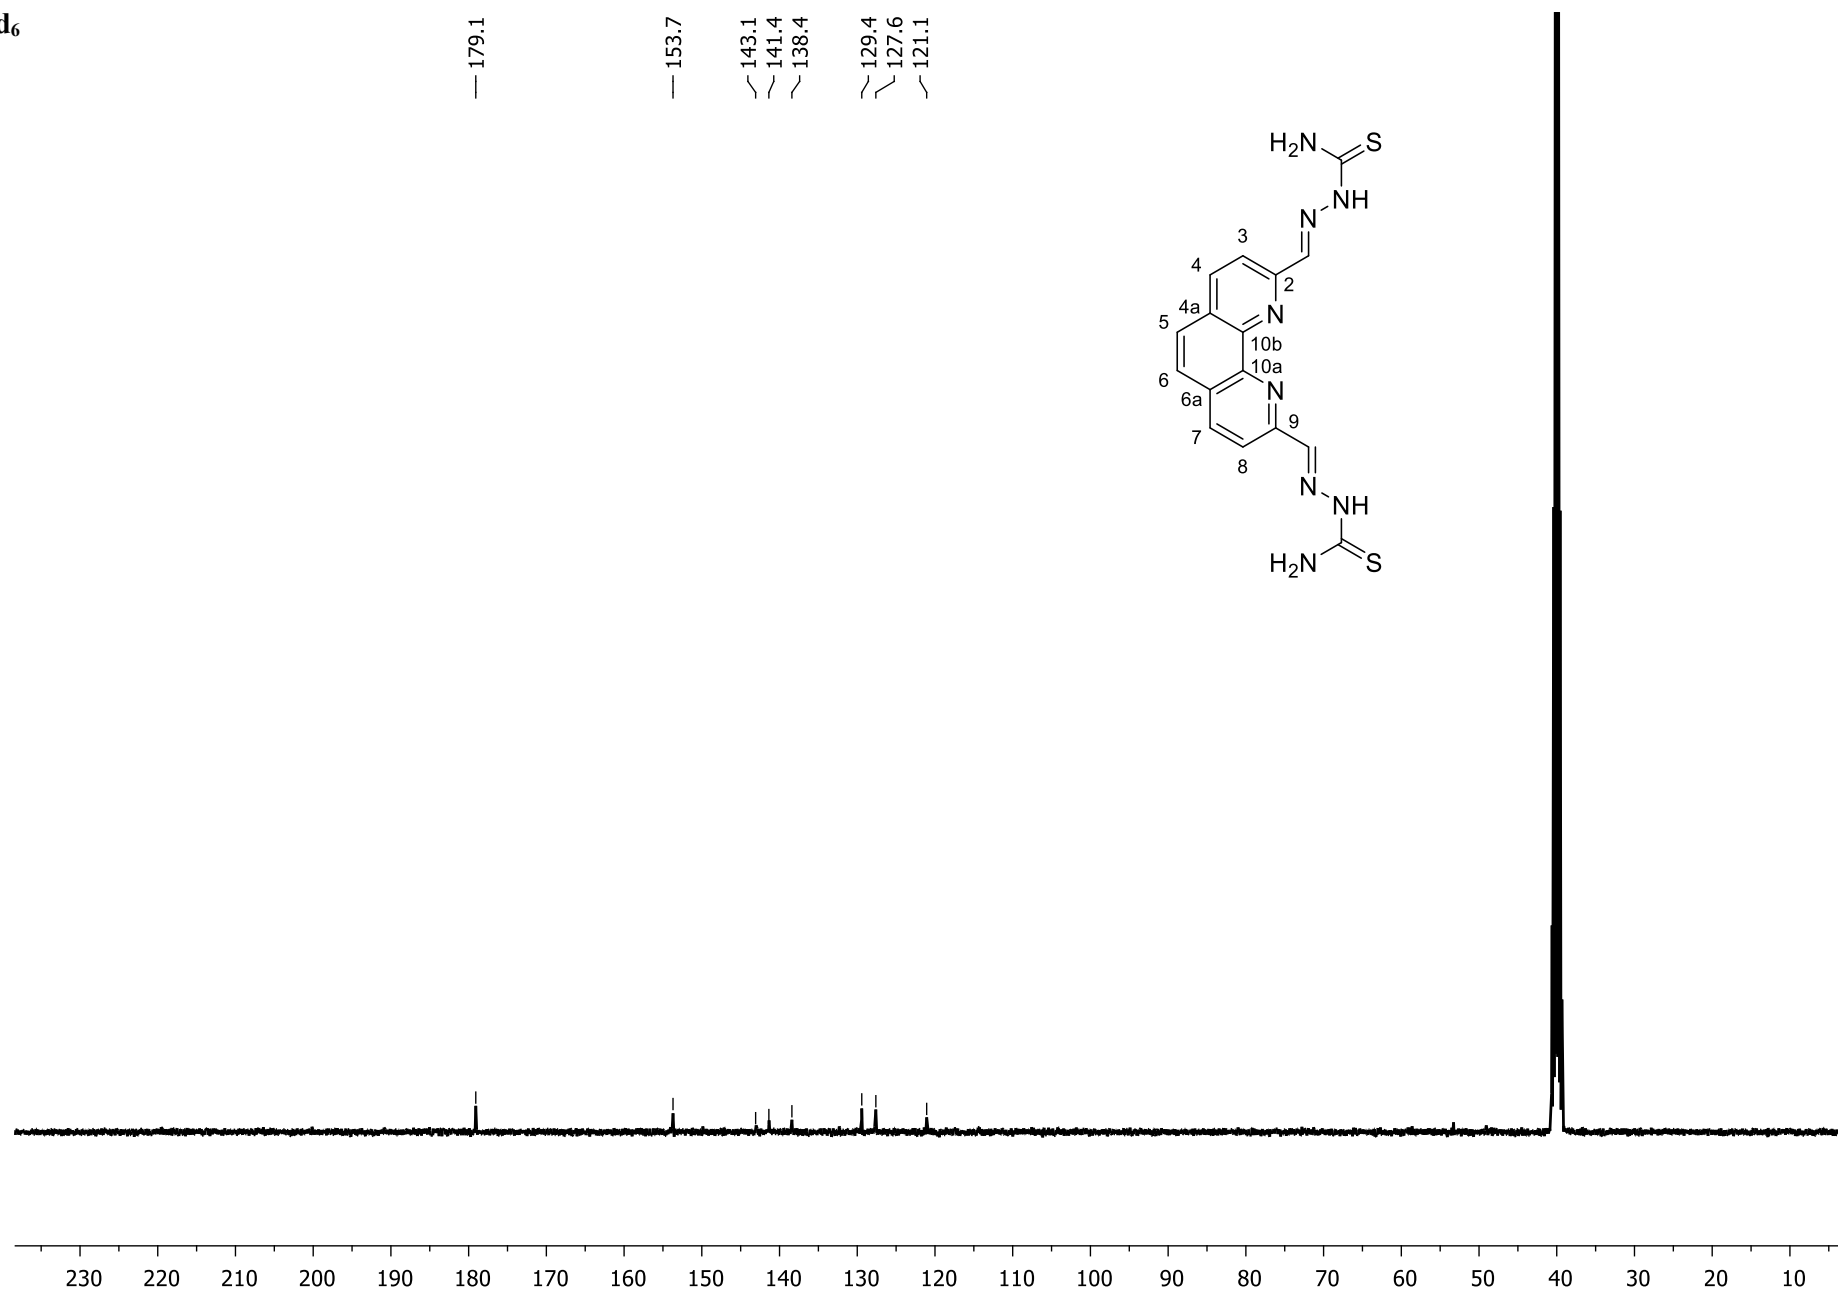

Figure S2. <sup>13</sup>C NMR (101 MHz, DMSO-d<sub>6</sub>) of **1**

DMSO-d<sub>6</sub>

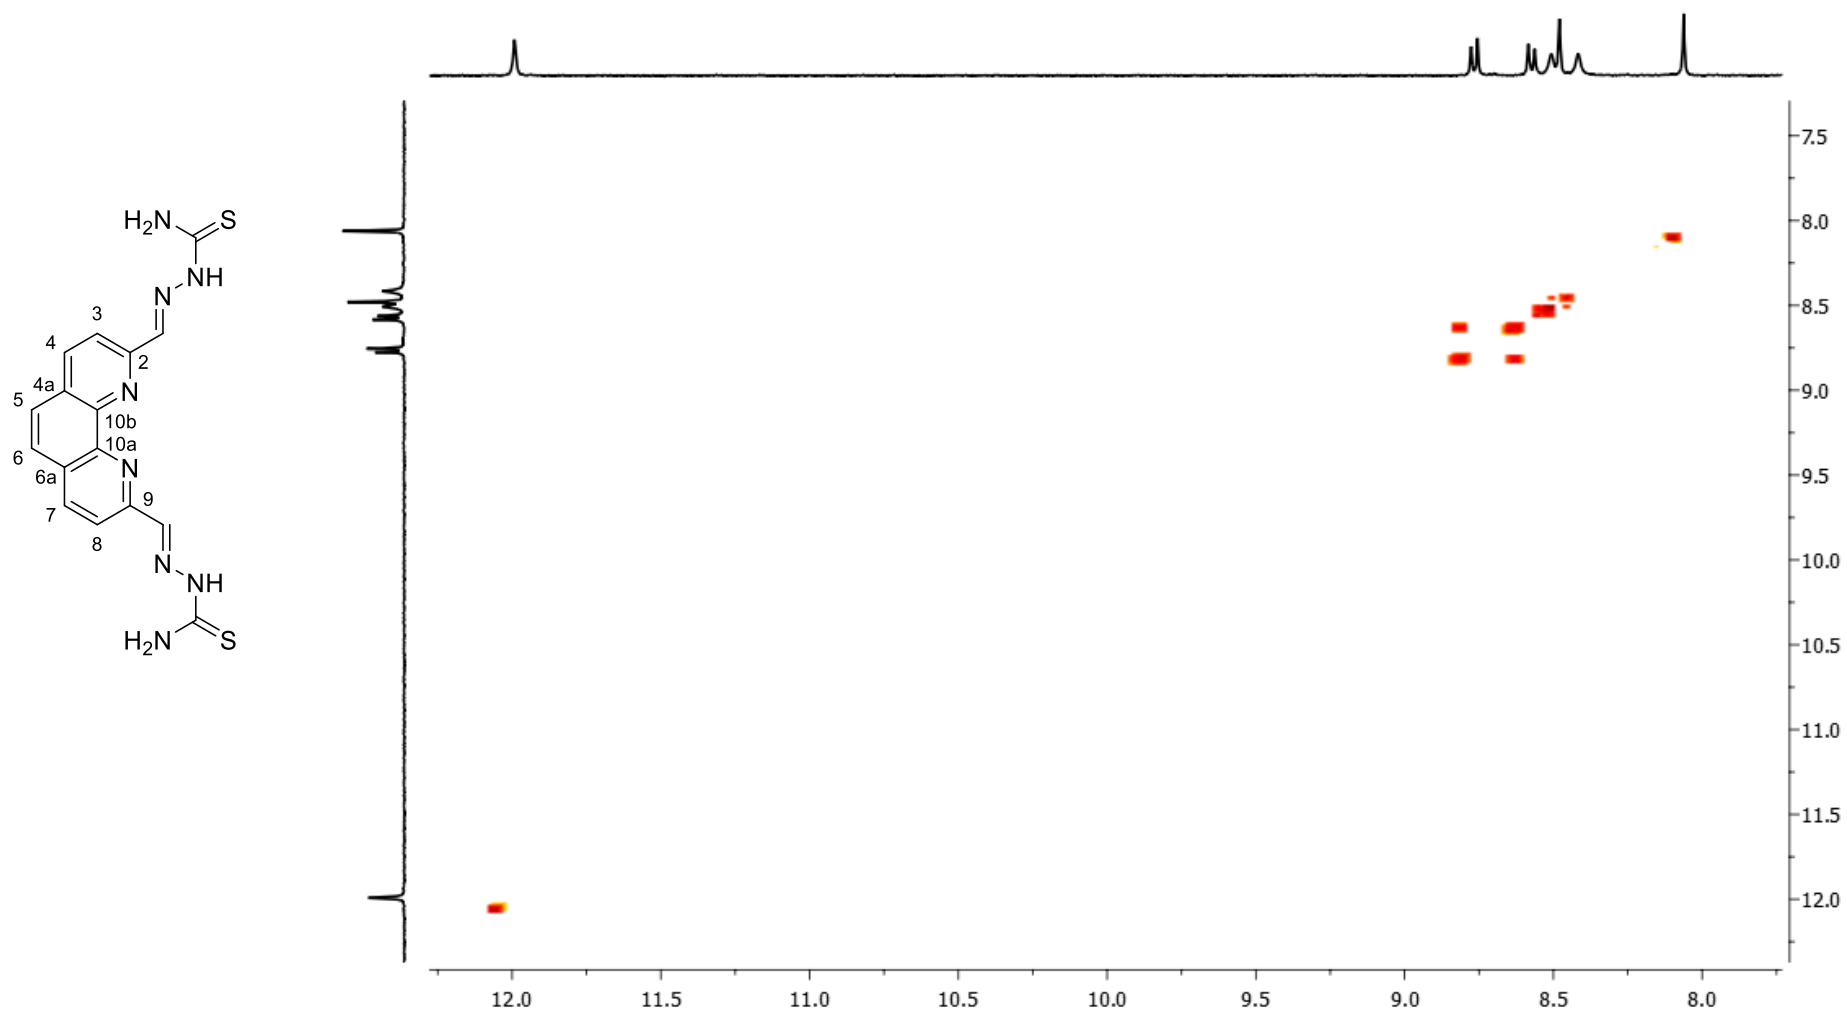

**Figure S3.** <sup>1</sup>H-<sup>1</sup>H-COSY (400 MHz, DMSO-d<sub>6</sub>) of **1**

DMSO-d<sub>6</sub>

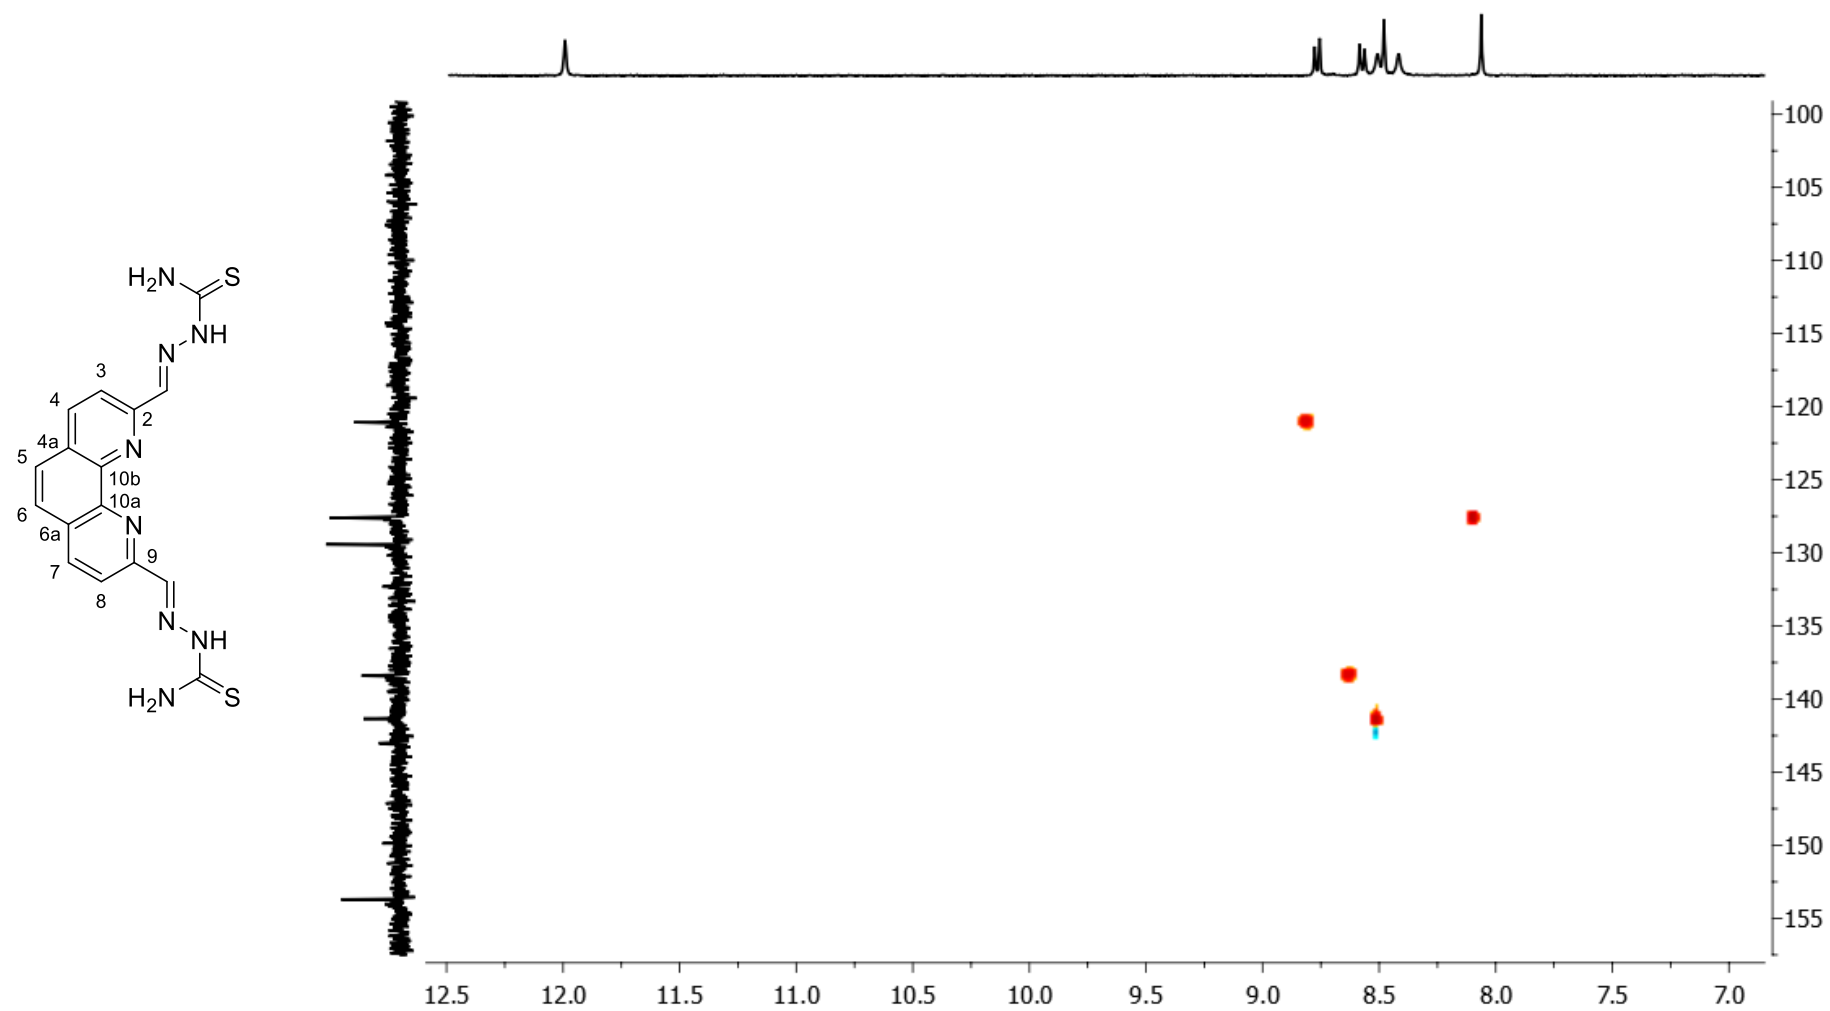

**Figure S4.** <sup>1</sup>H-<sup>13</sup>C-HSQC (400 MHz, DMSO-d<sub>6</sub>) of **1**

DMSO-d<sub>6</sub>

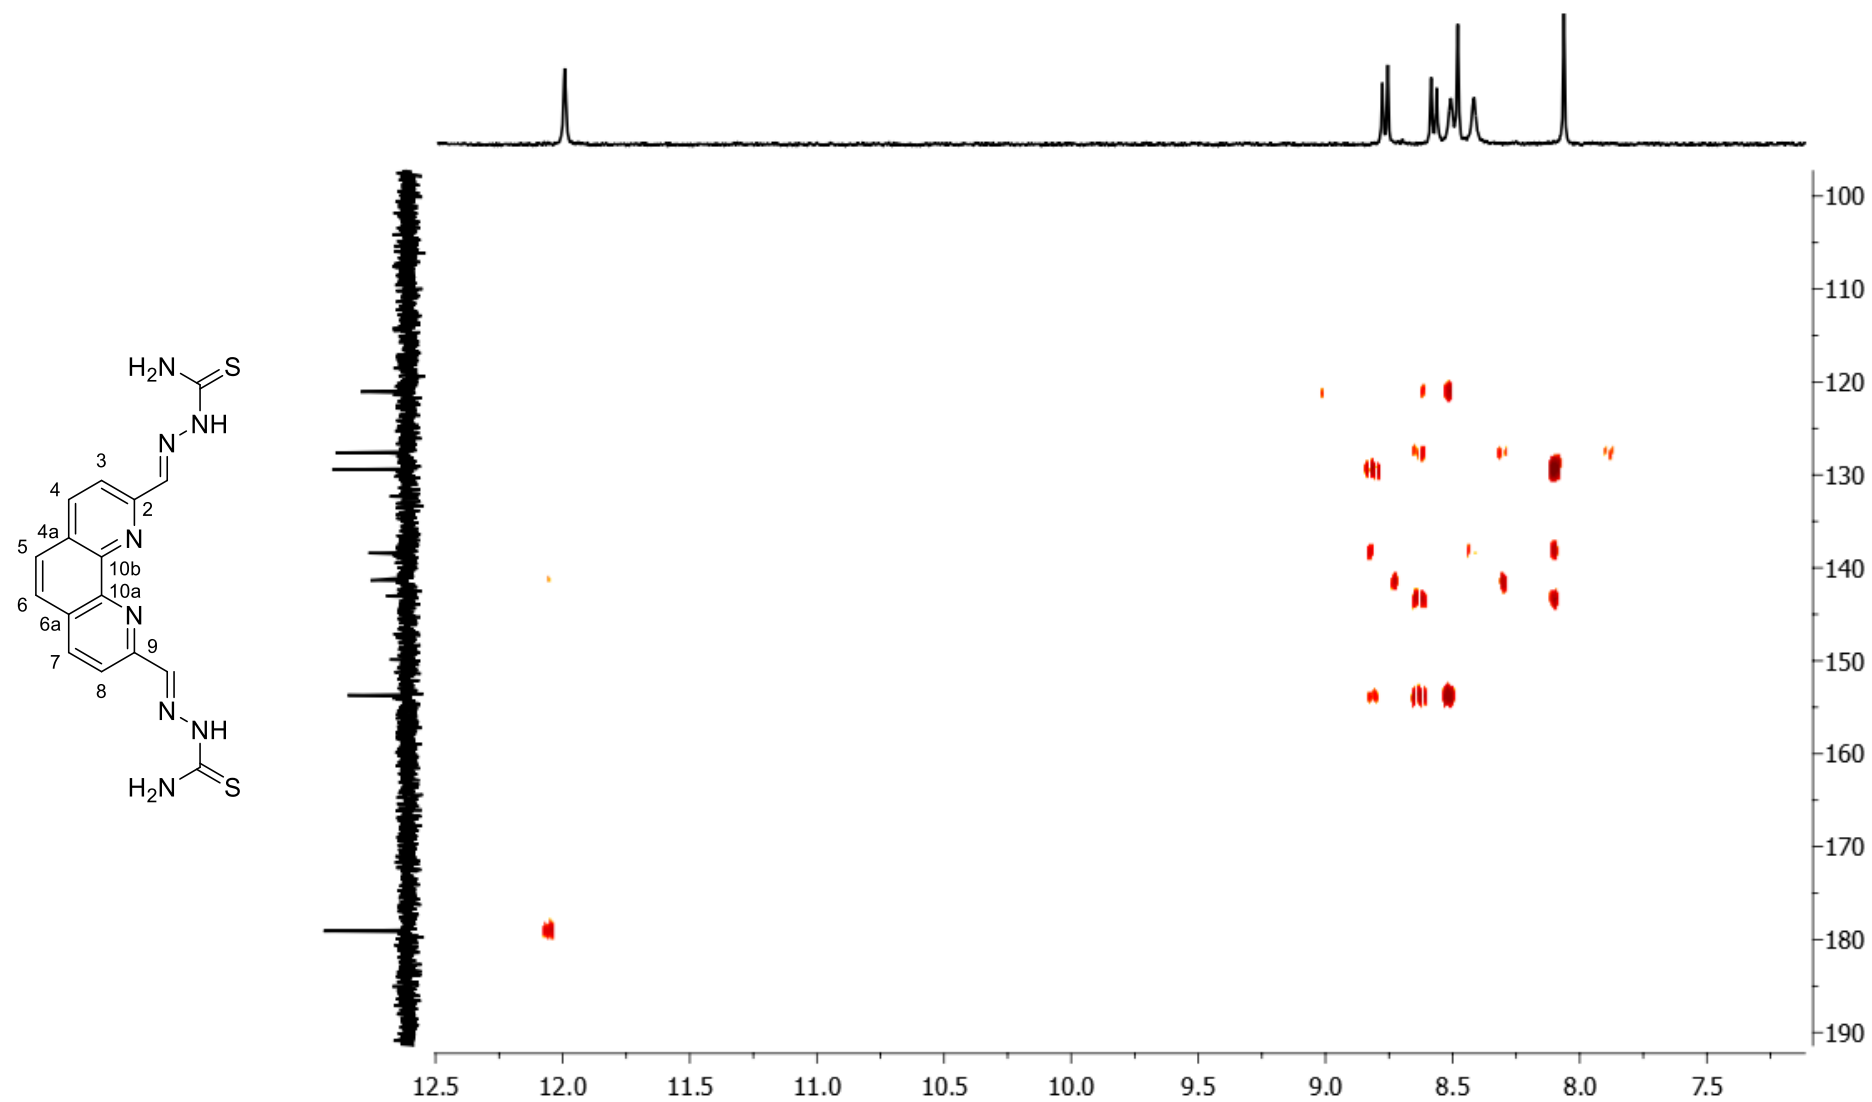

**Figure S5.** <sup>1</sup>H-<sup>13</sup>C-HMBC (400 MHz, DMSO-d<sub>6</sub>) of **1**

DMSO-d<sub>6</sub>

— 12.02

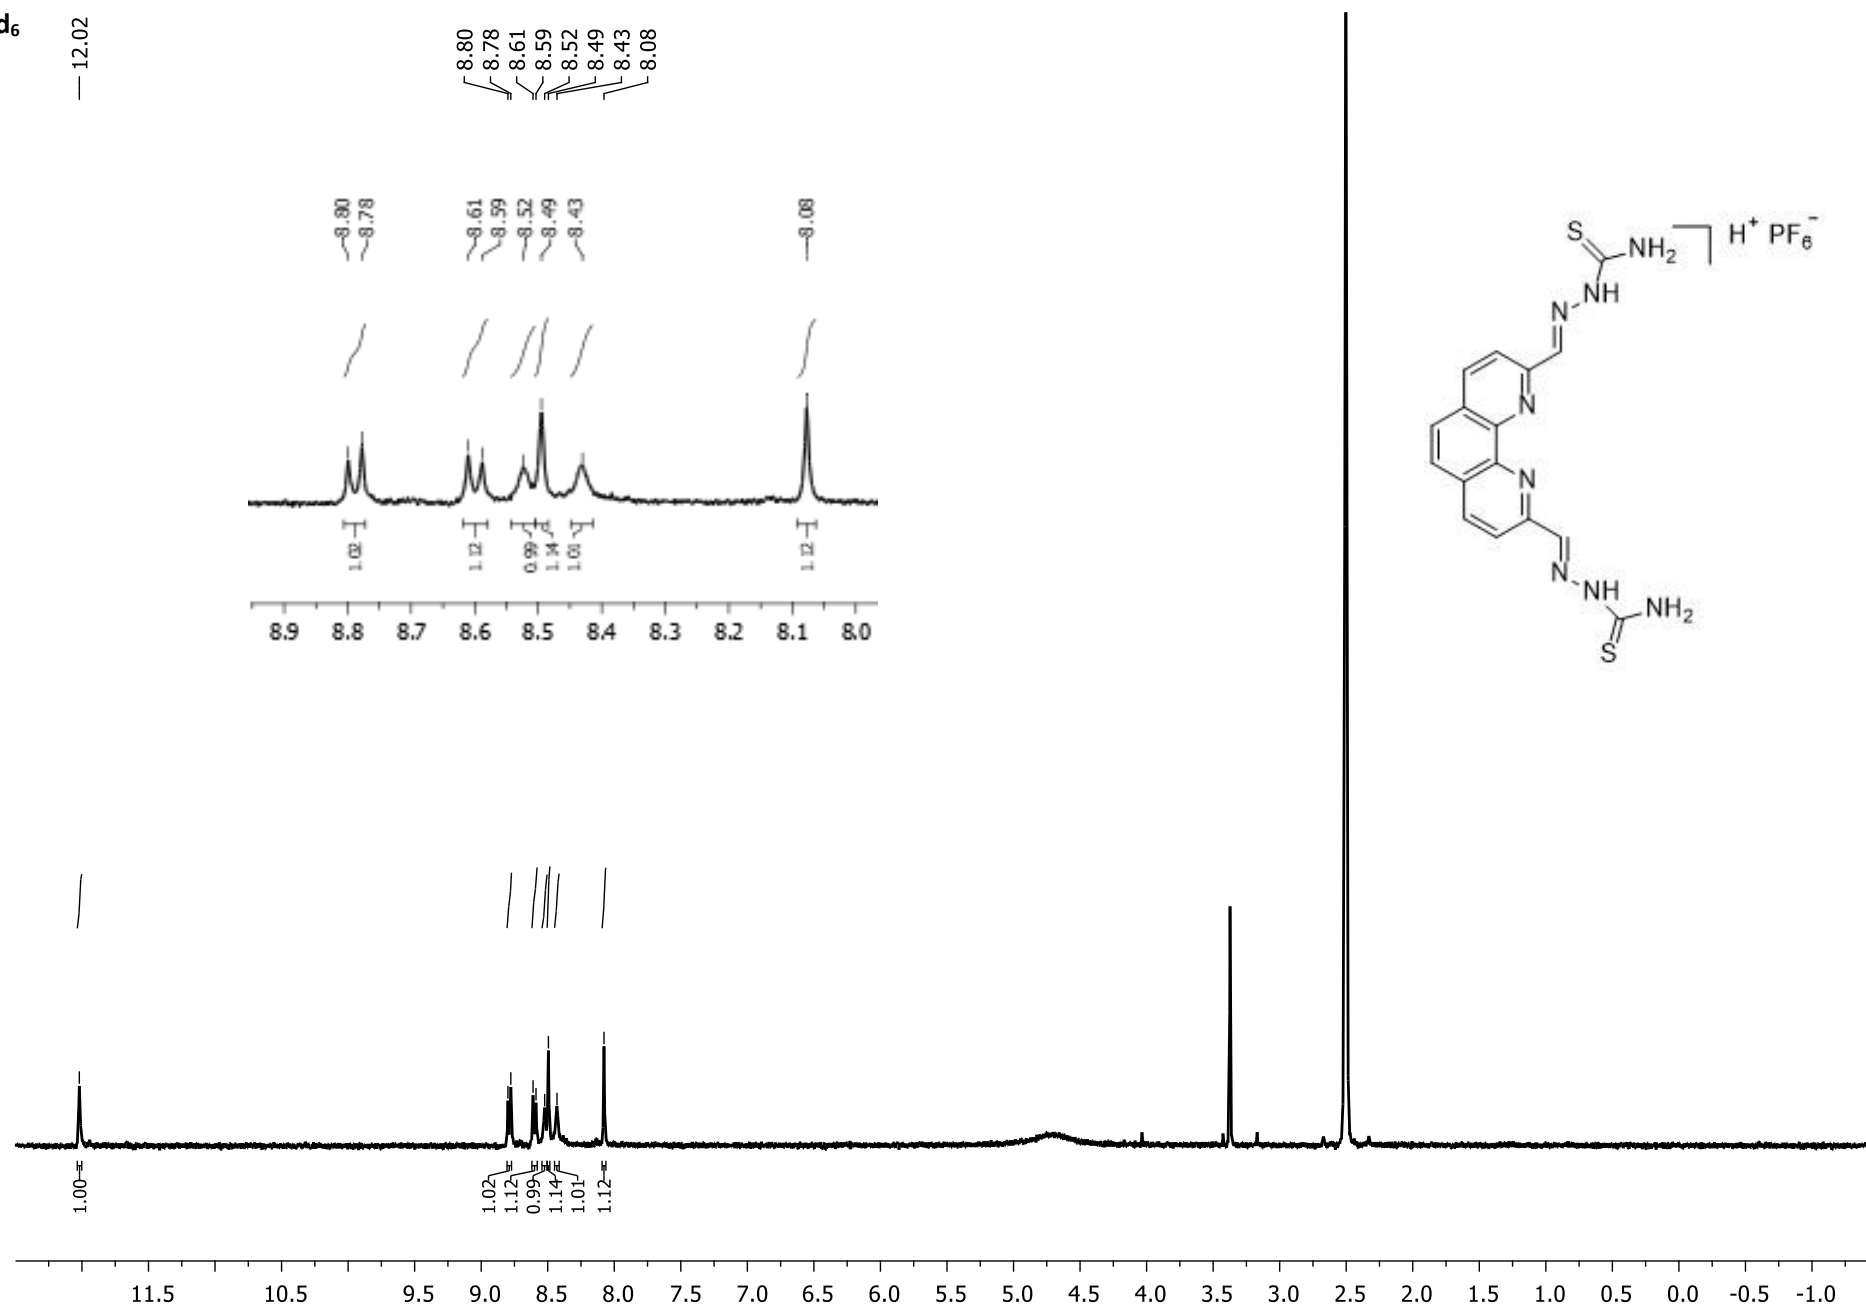

Figure S6. <sup>1</sup>H NMR (400 MHz, DMSO-d<sub>6</sub>) of **2**

DMSO-d<sub>6</sub>

— 179.0

— 154.0

— 144.5

— 142.4

— 137.6

— 129.3

— 127.5

— 120.7

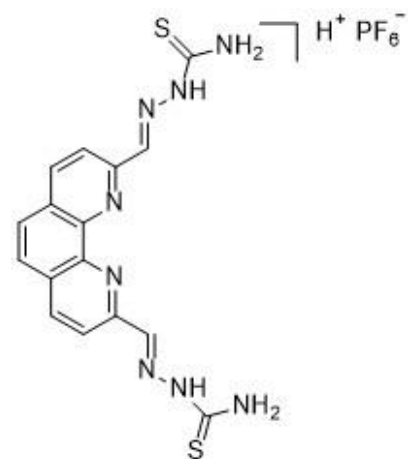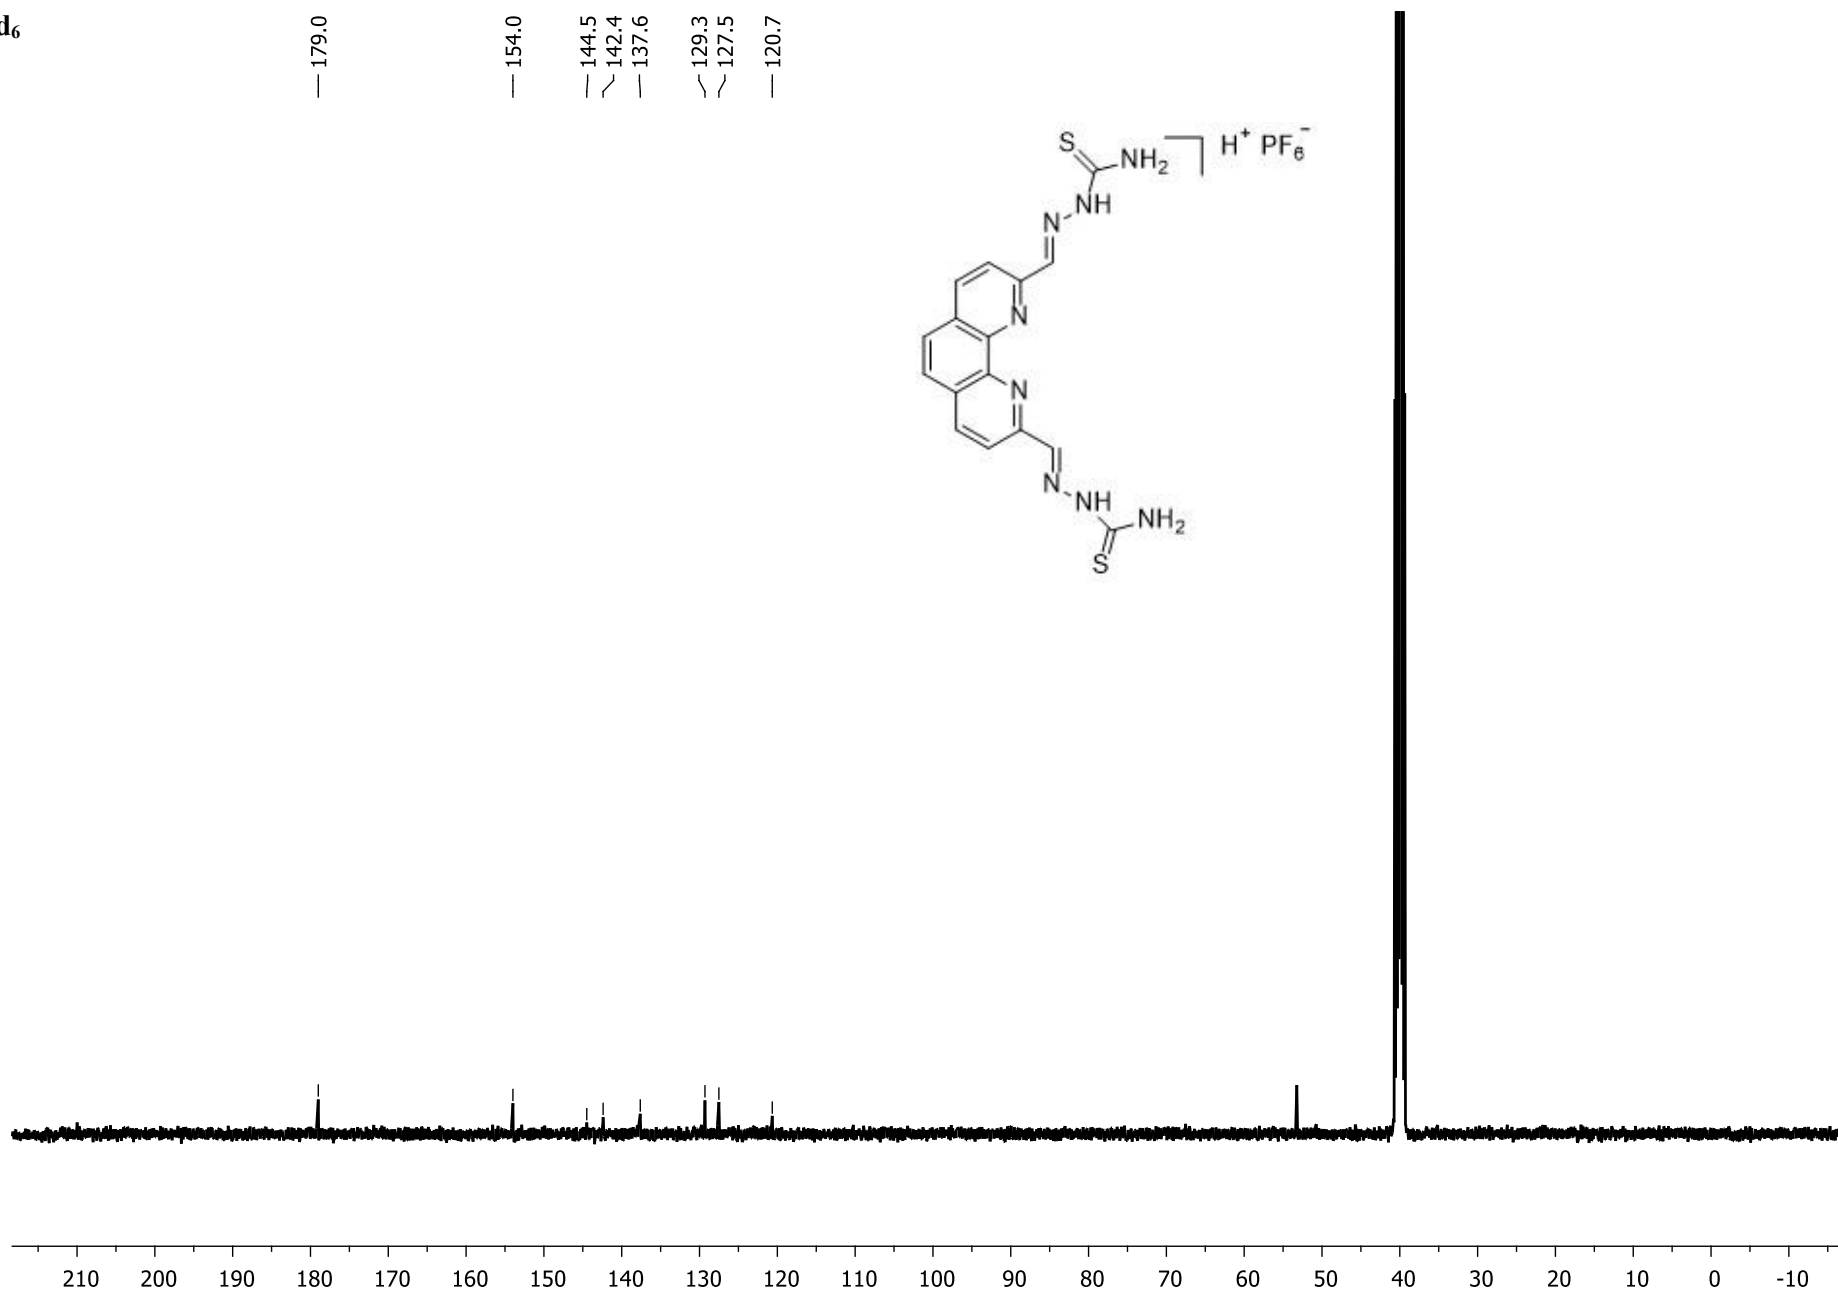

Figure S7. <sup>13</sup>C NMR (101 MHz, DMSO-d<sub>6</sub>) of **2**



DMSO-d<sub>6</sub>

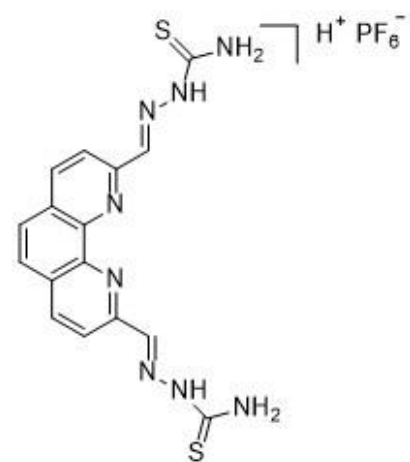

-69.20  
-71.08

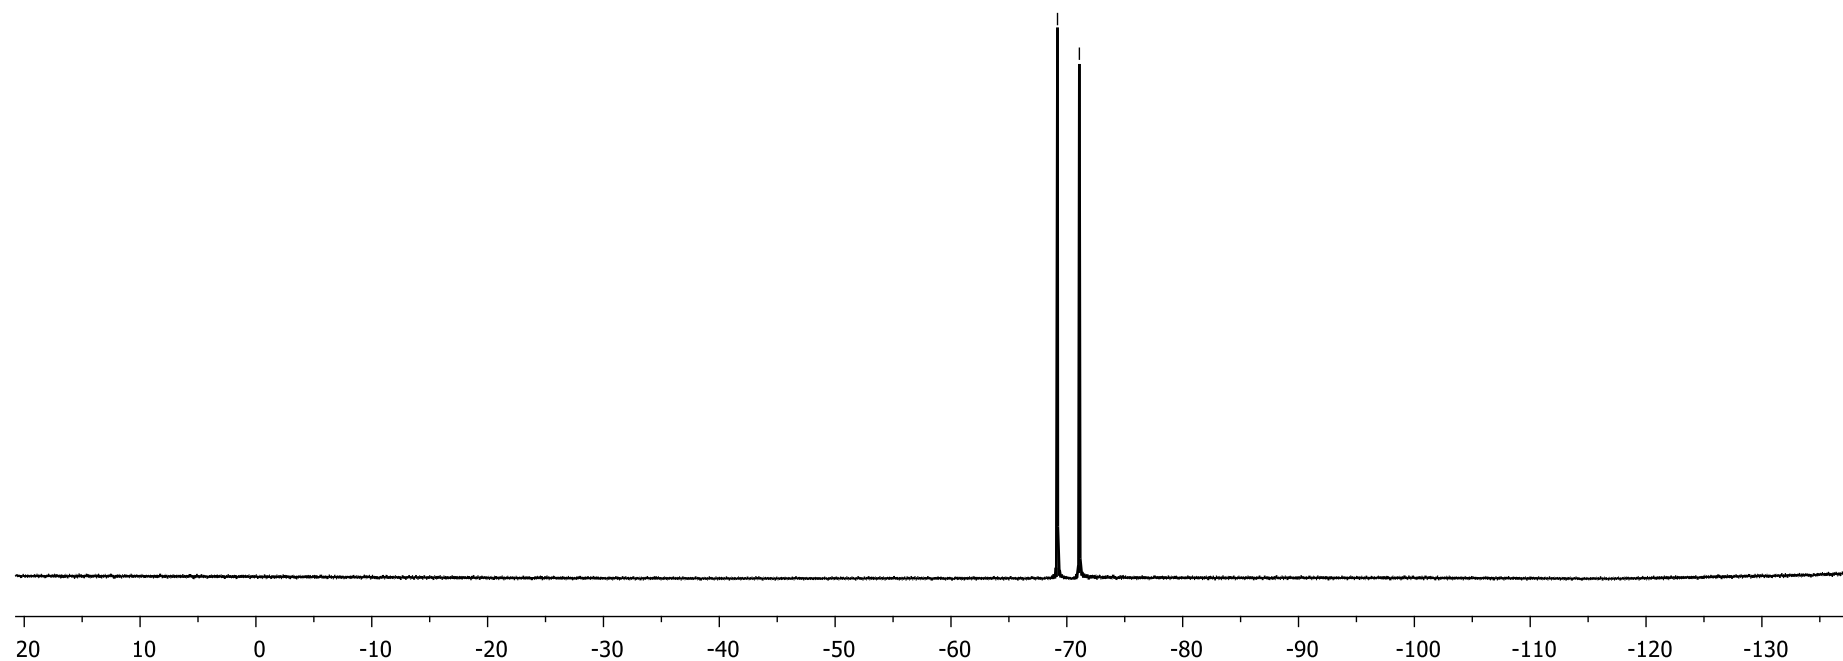

**Figure S8.** <sup>19</sup>F NMR (376 MHz, DMSO-d<sub>6</sub>) of **2**

DMSO-d<sub>6</sub>

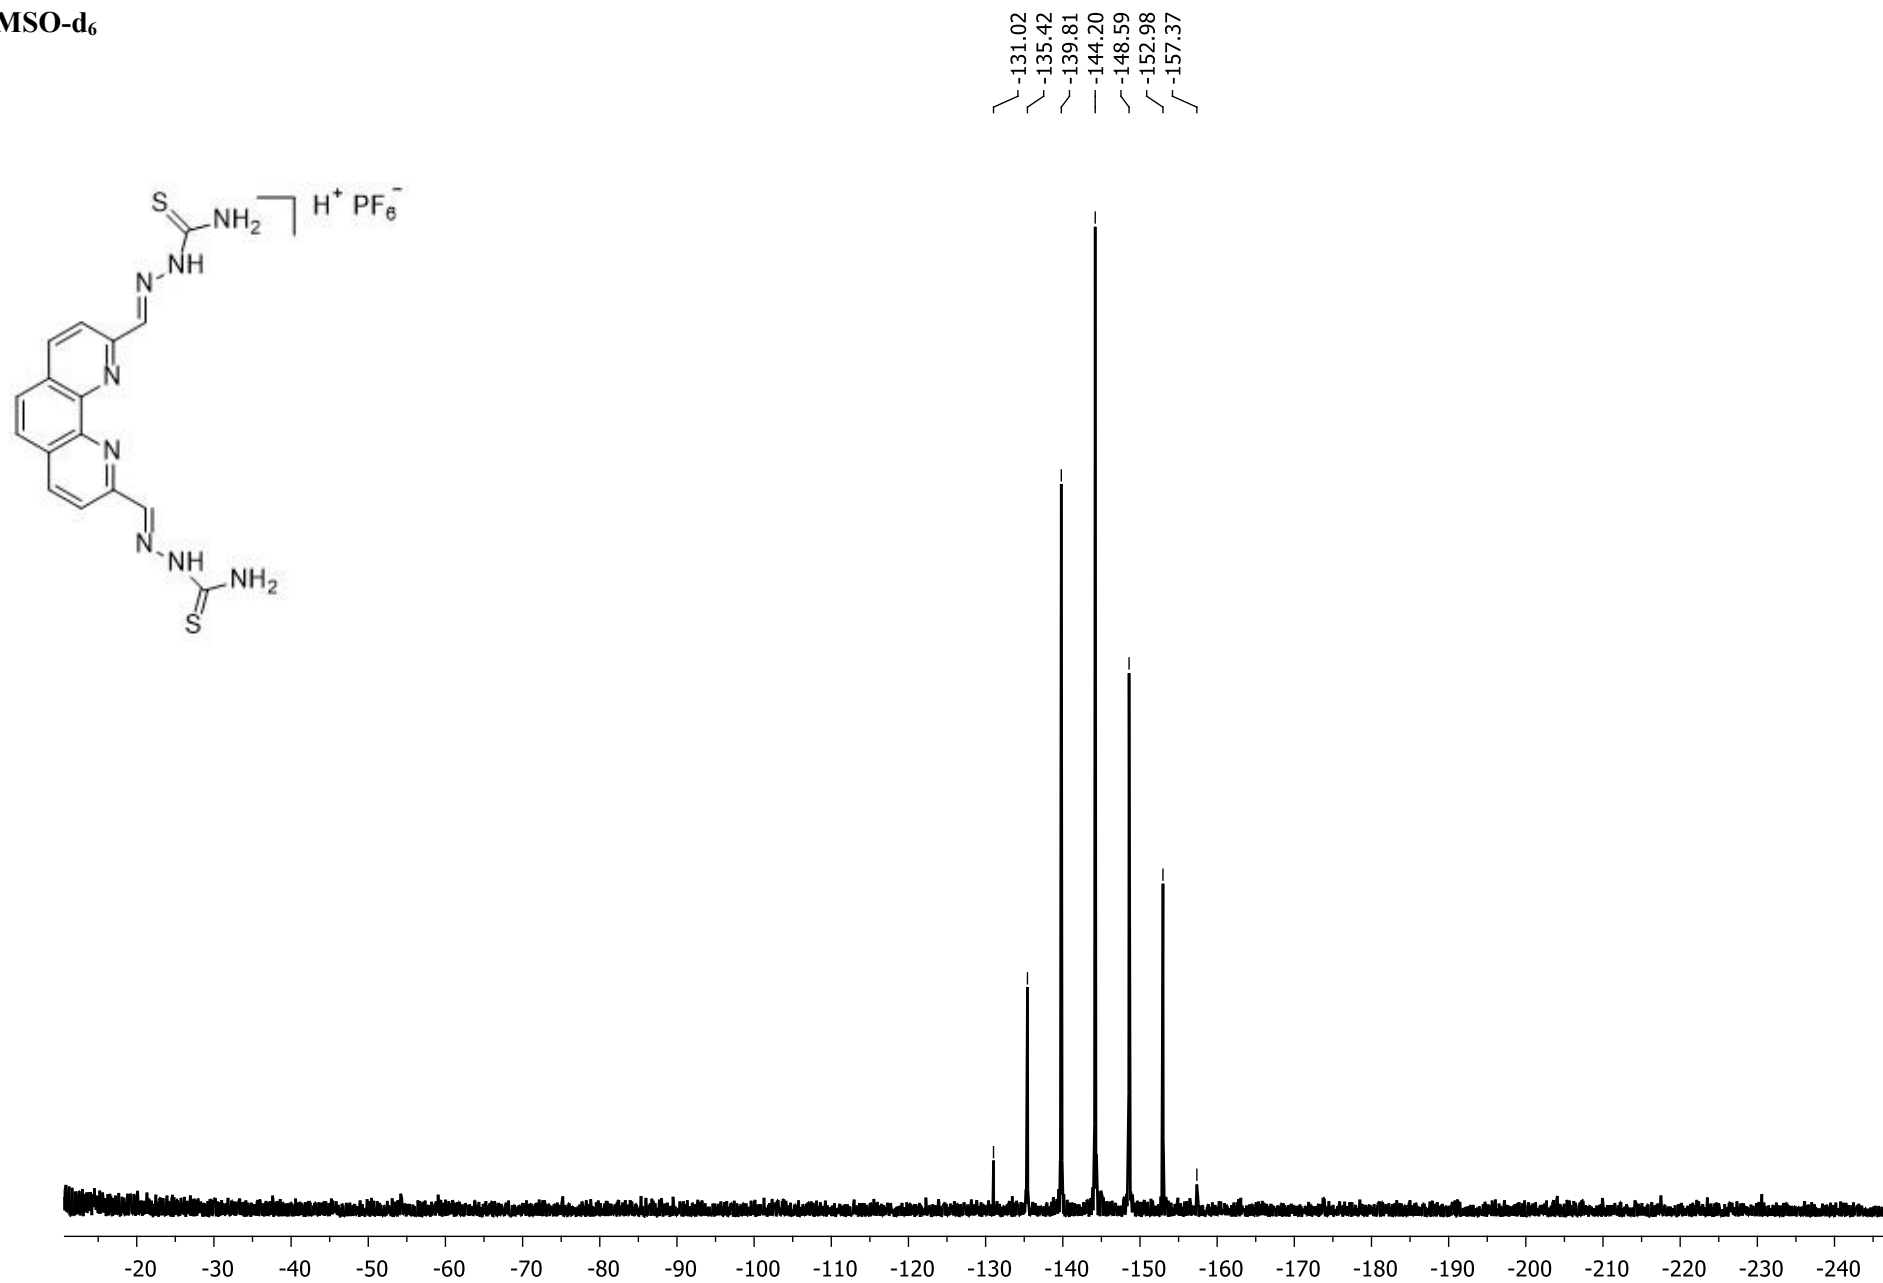

**Figure S9.** <sup>31</sup>P NMR (162 MHz, DMSO-d<sub>6</sub>) of **2**

DMSO-d<sub>6</sub>

— 12.01

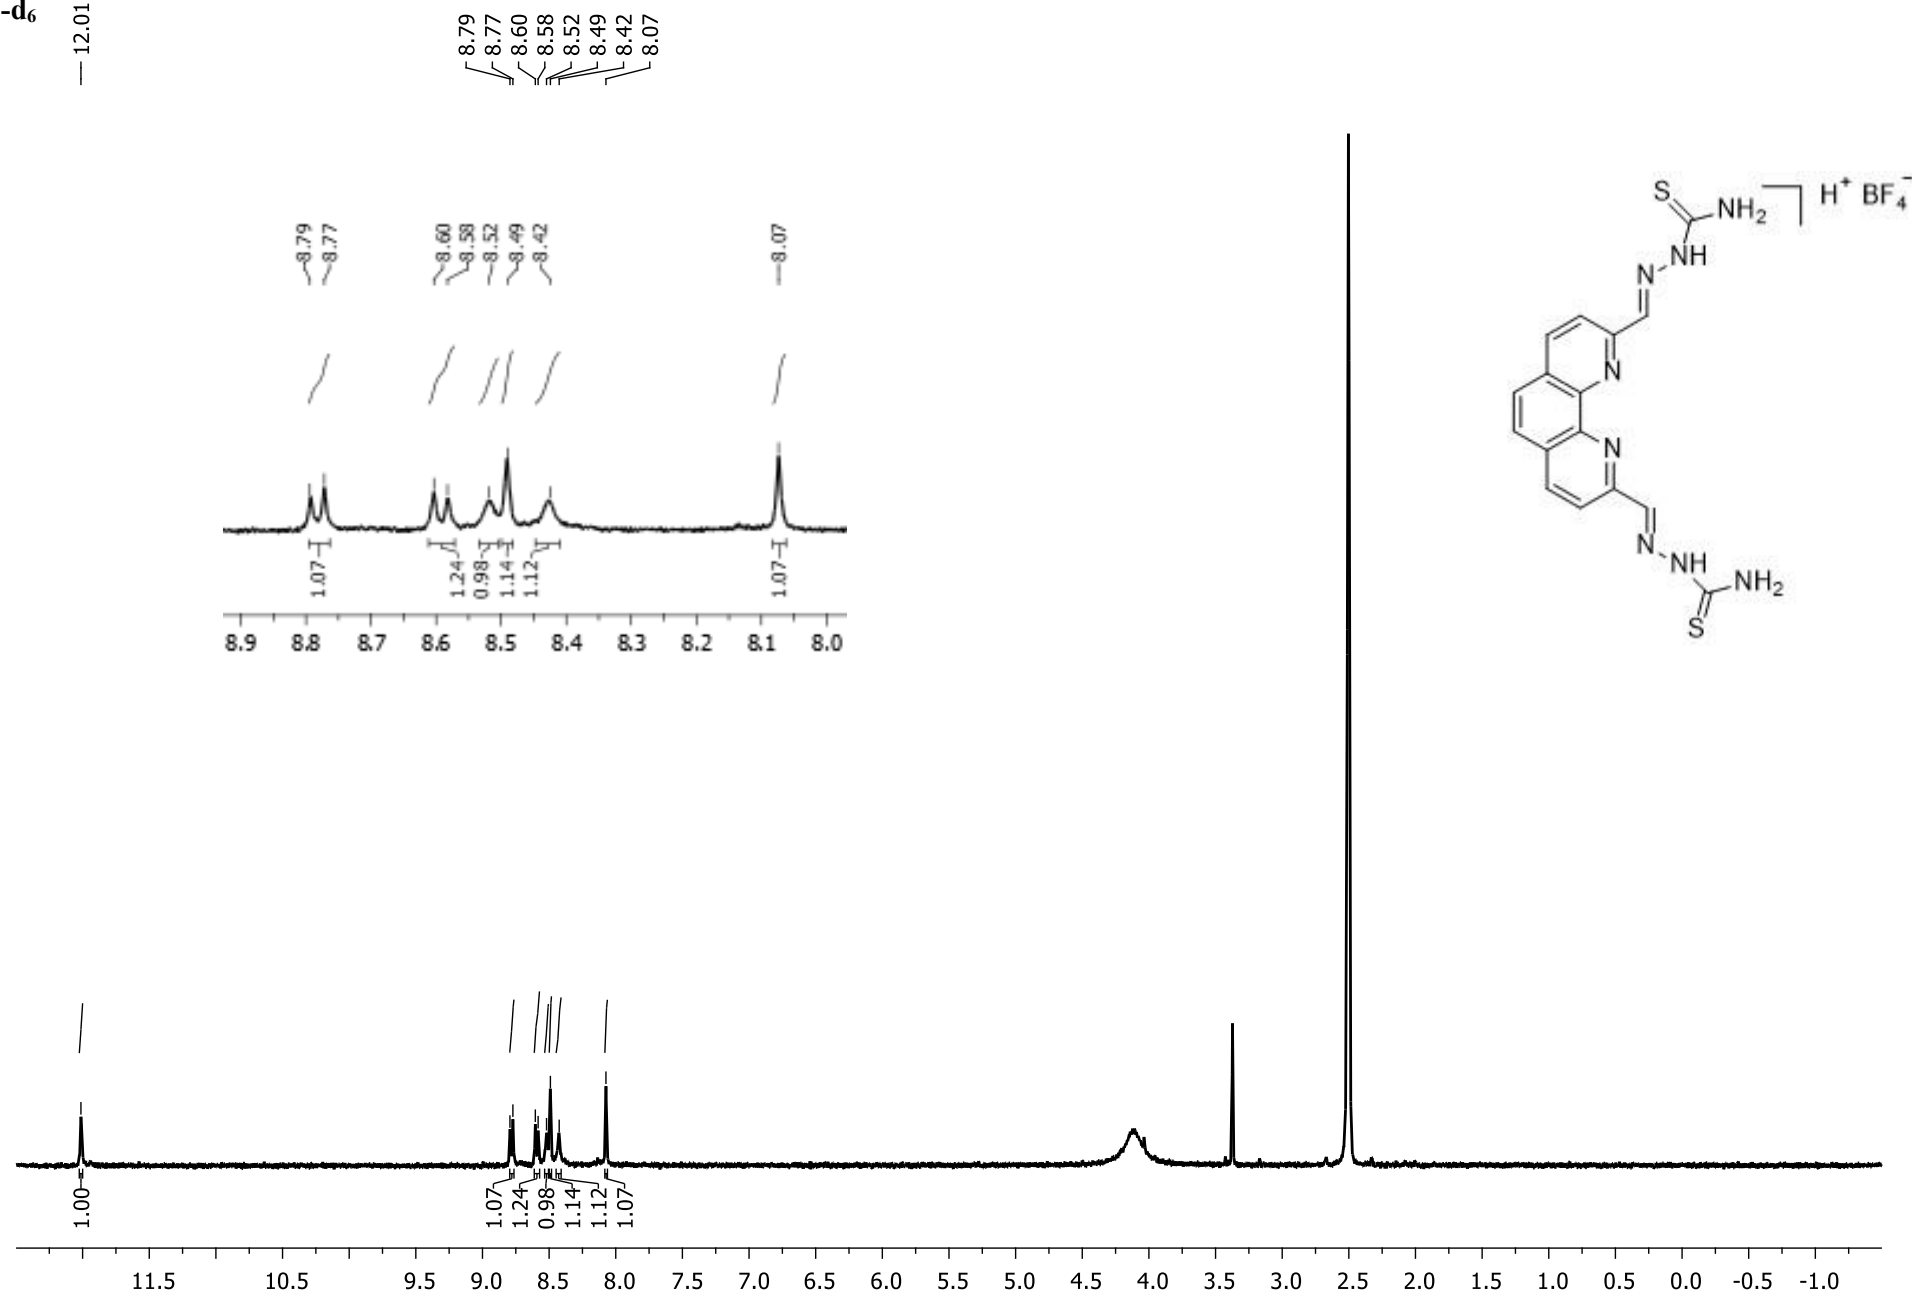

**Figure S10.** <sup>1</sup>H NMR (400 MHz, DMSO-d<sub>6</sub>) of **3**

DMSO-d<sub>6</sub>

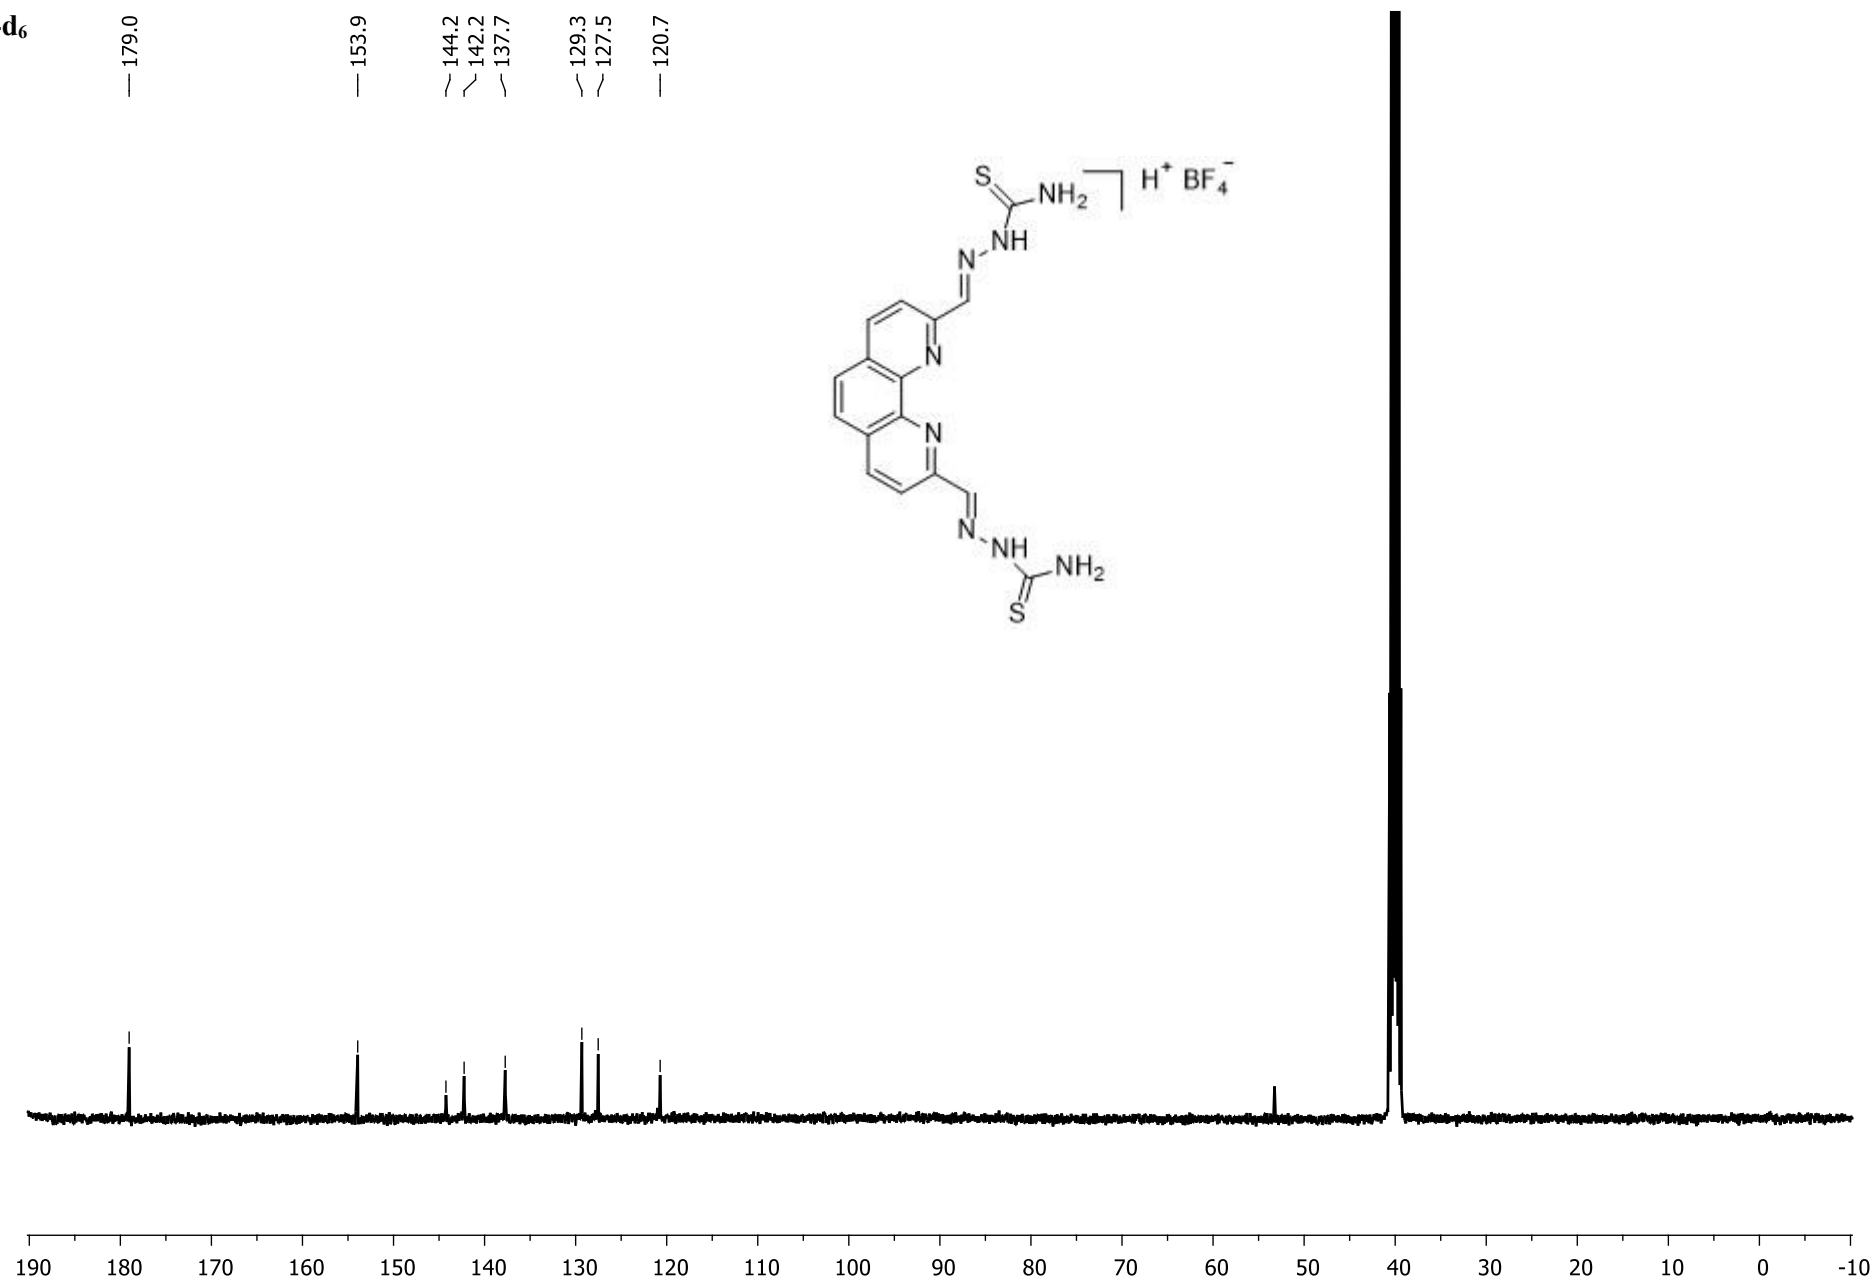

Figure S11. <sup>13</sup>C NMR (101 MHz, DMSO-d<sub>6</sub>) of **3**

DMSO-d<sub>6</sub>

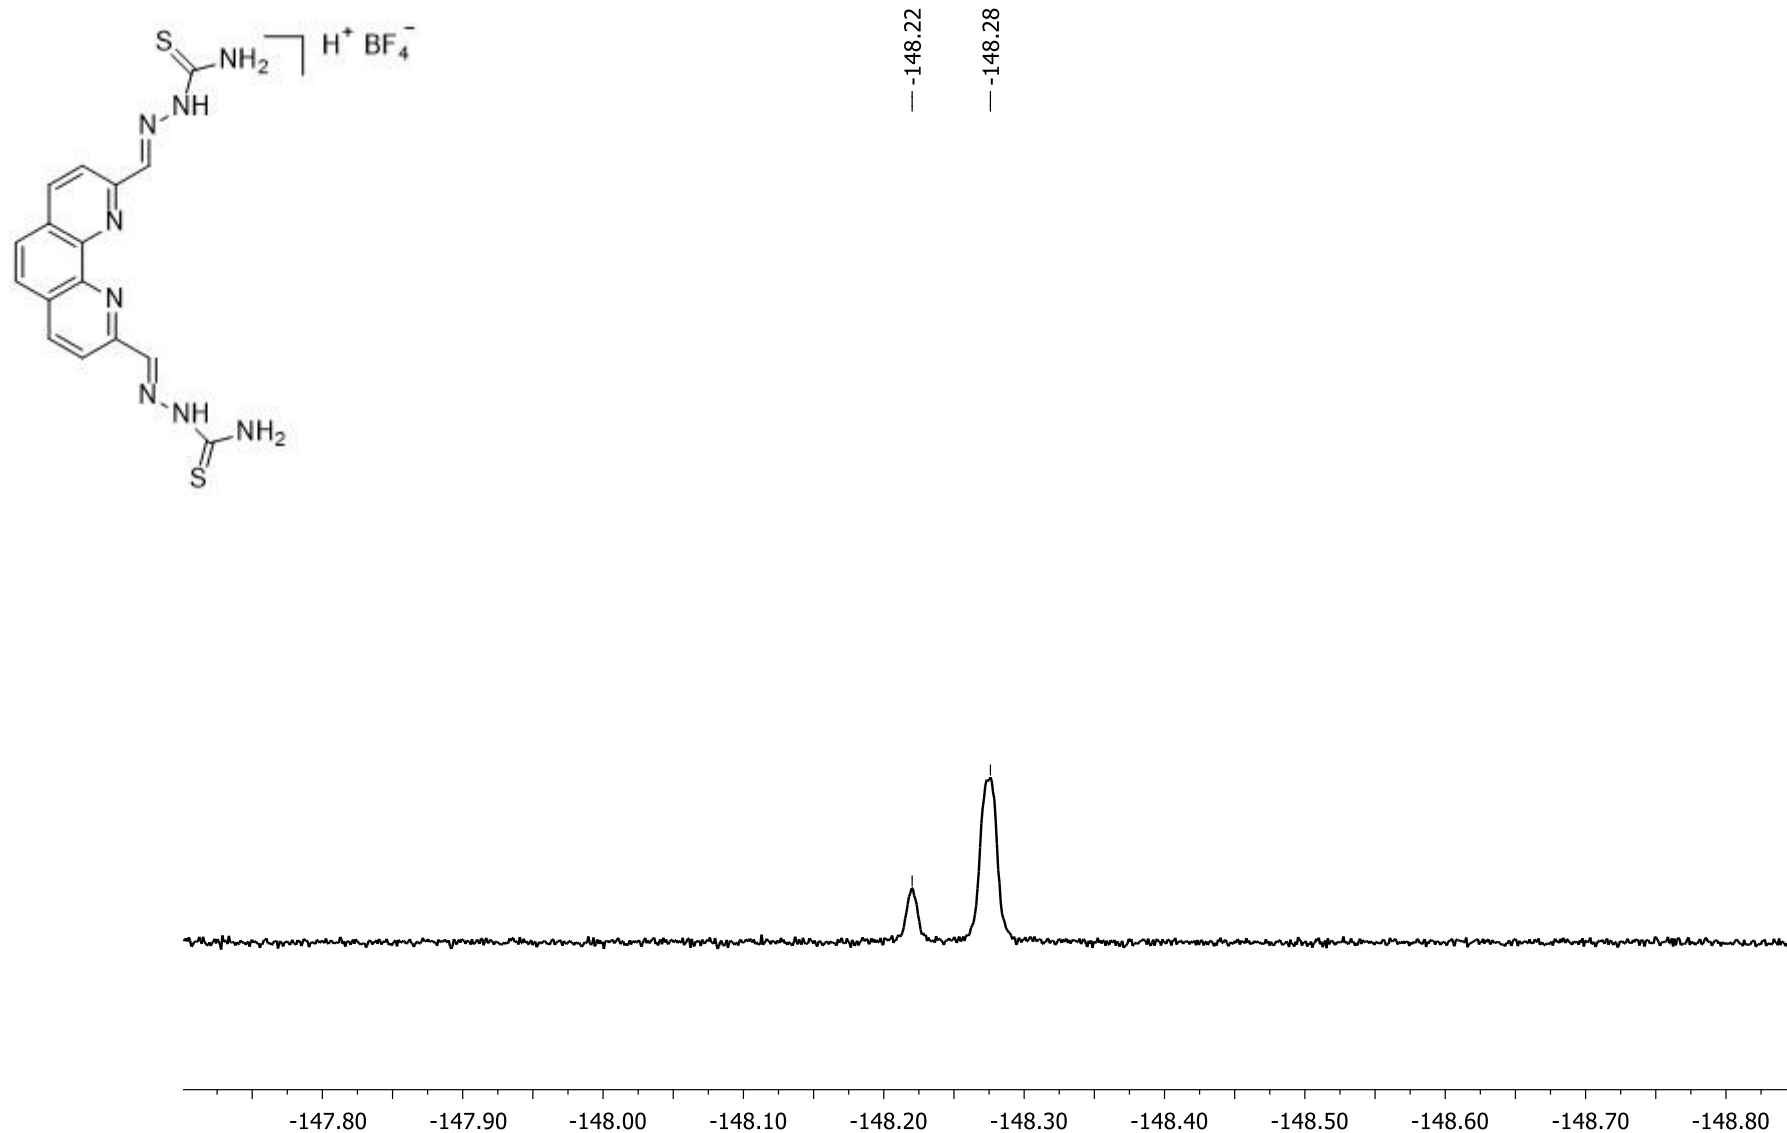

**Figure S12.** <sup>19</sup>F NMR ((376 MHz, DMSO-d<sub>6</sub>) of **3**

DMSO-d<sub>6</sub>

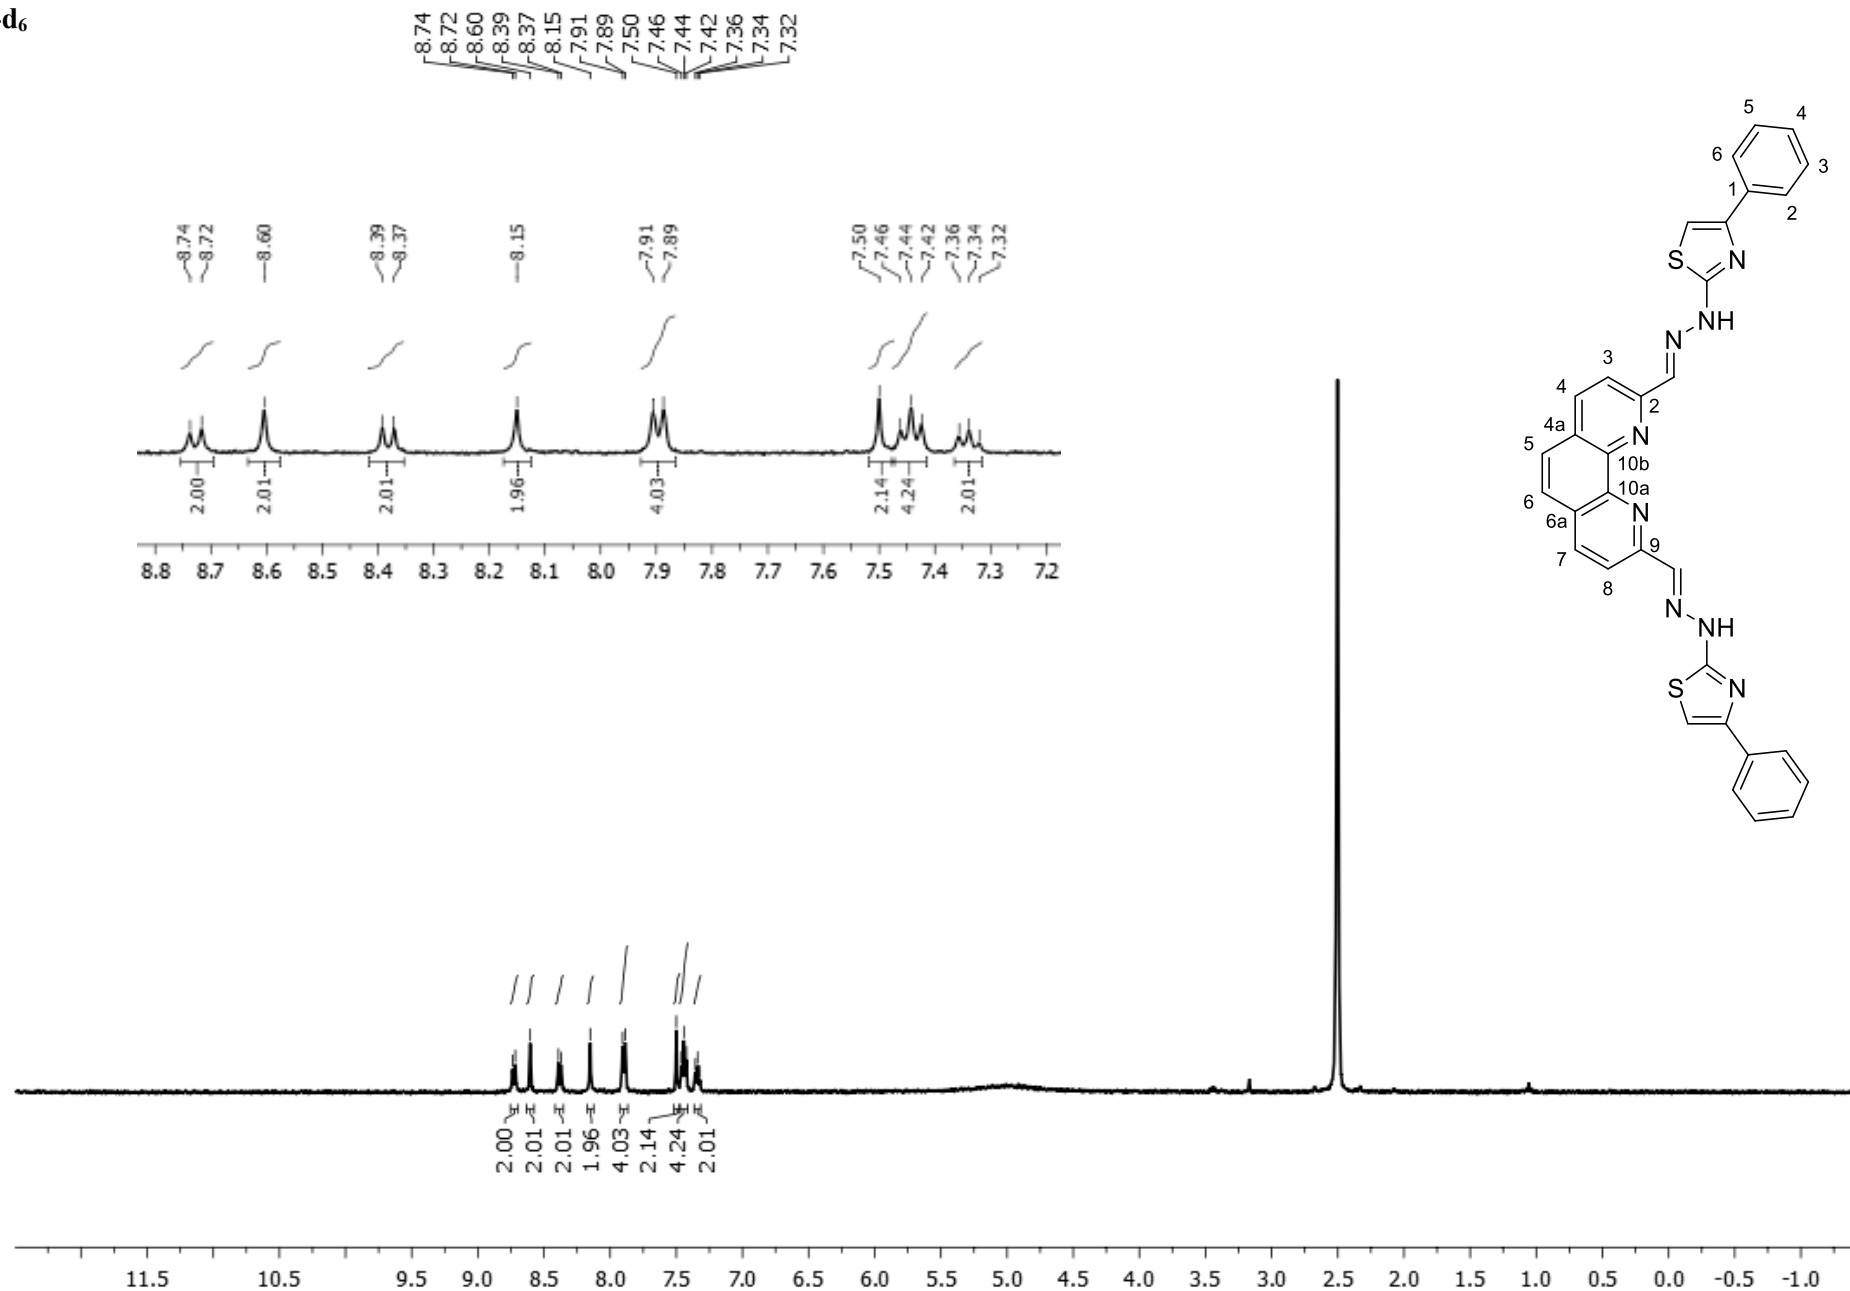

Figure S13. <sup>1</sup>H NMR (400 MHz, DMSO-d<sub>6</sub>) of 4

DMSO-d<sub>6</sub>

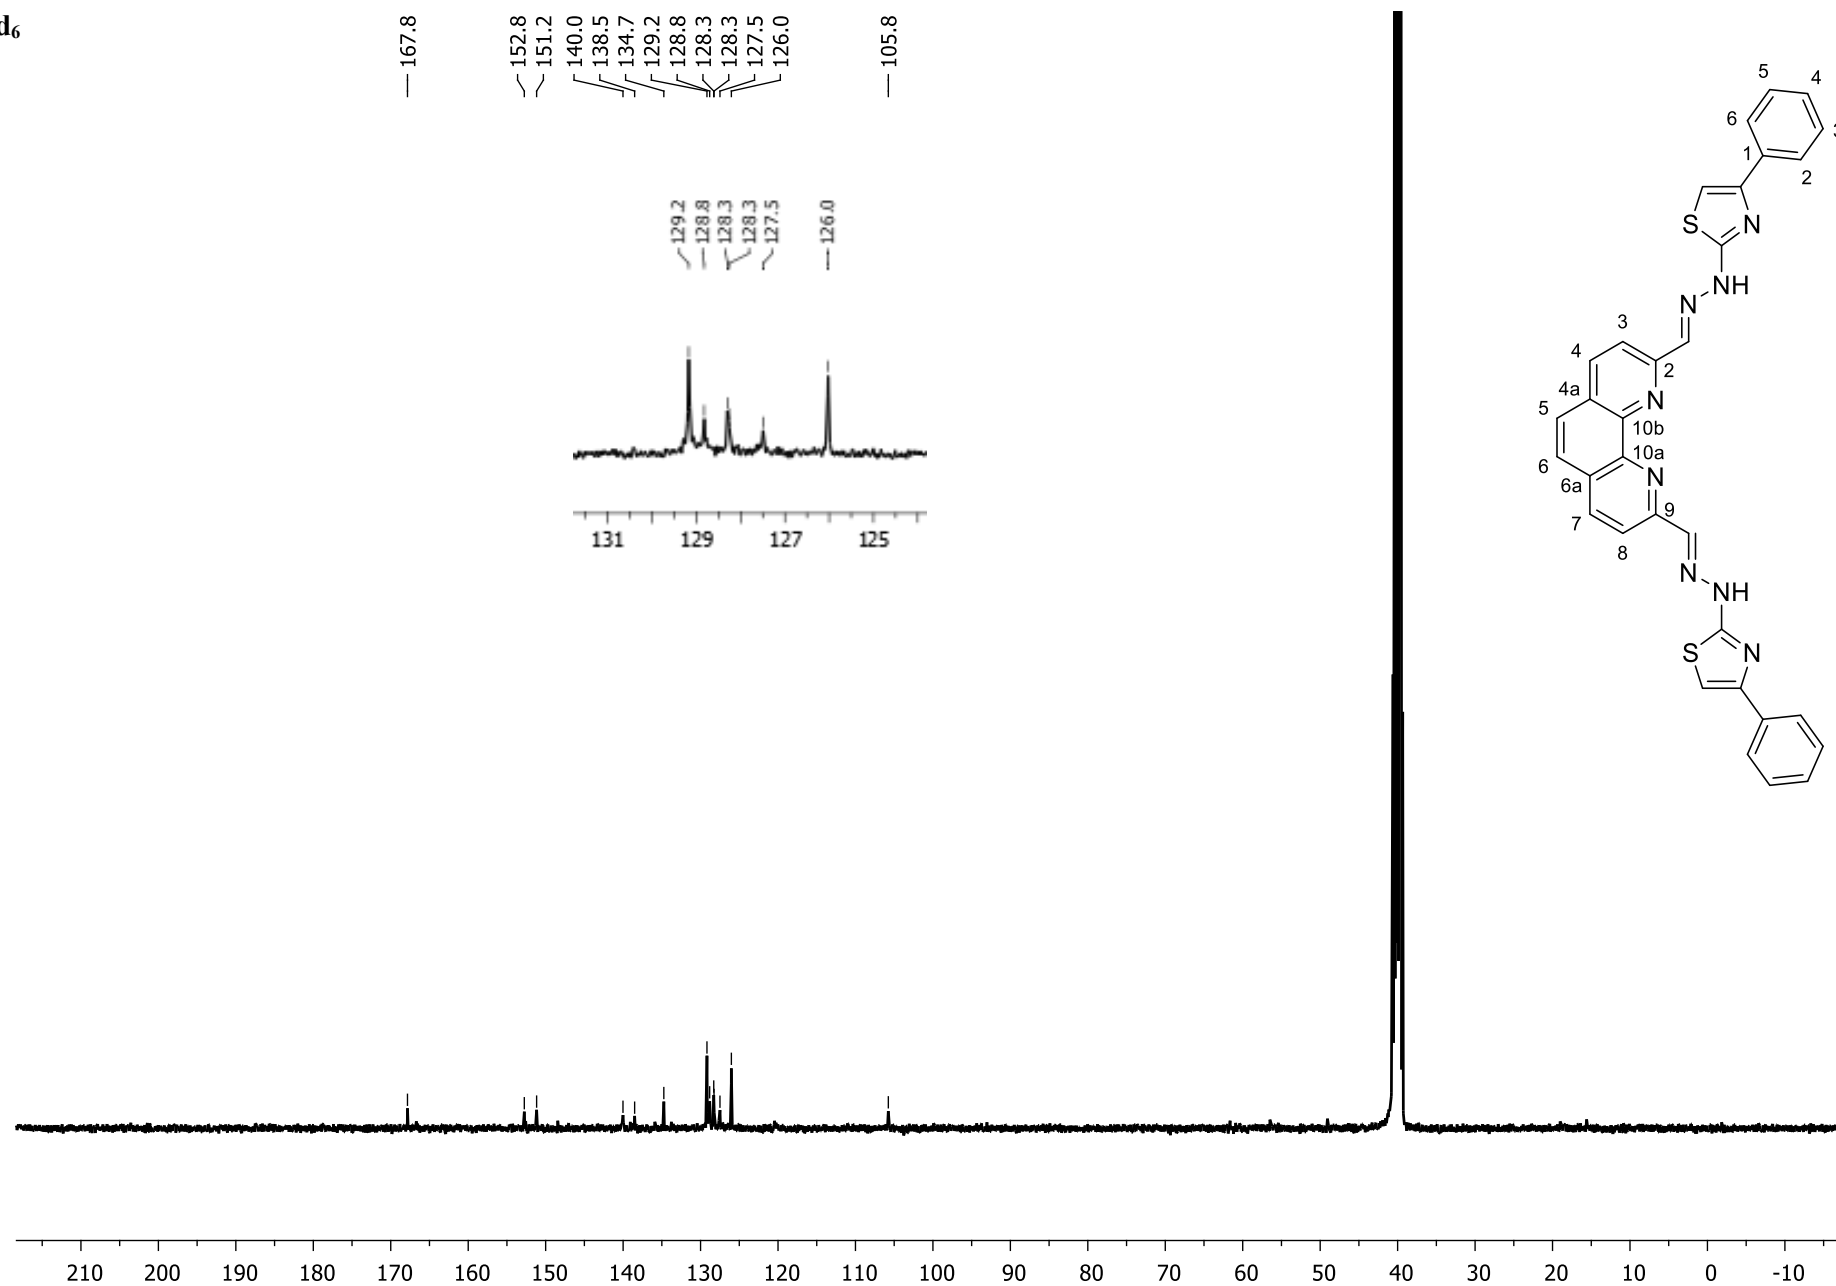

**Figure S14.** <sup>13</sup>C NMR (101 MHz, DMSO-d<sub>6</sub>) of **4**

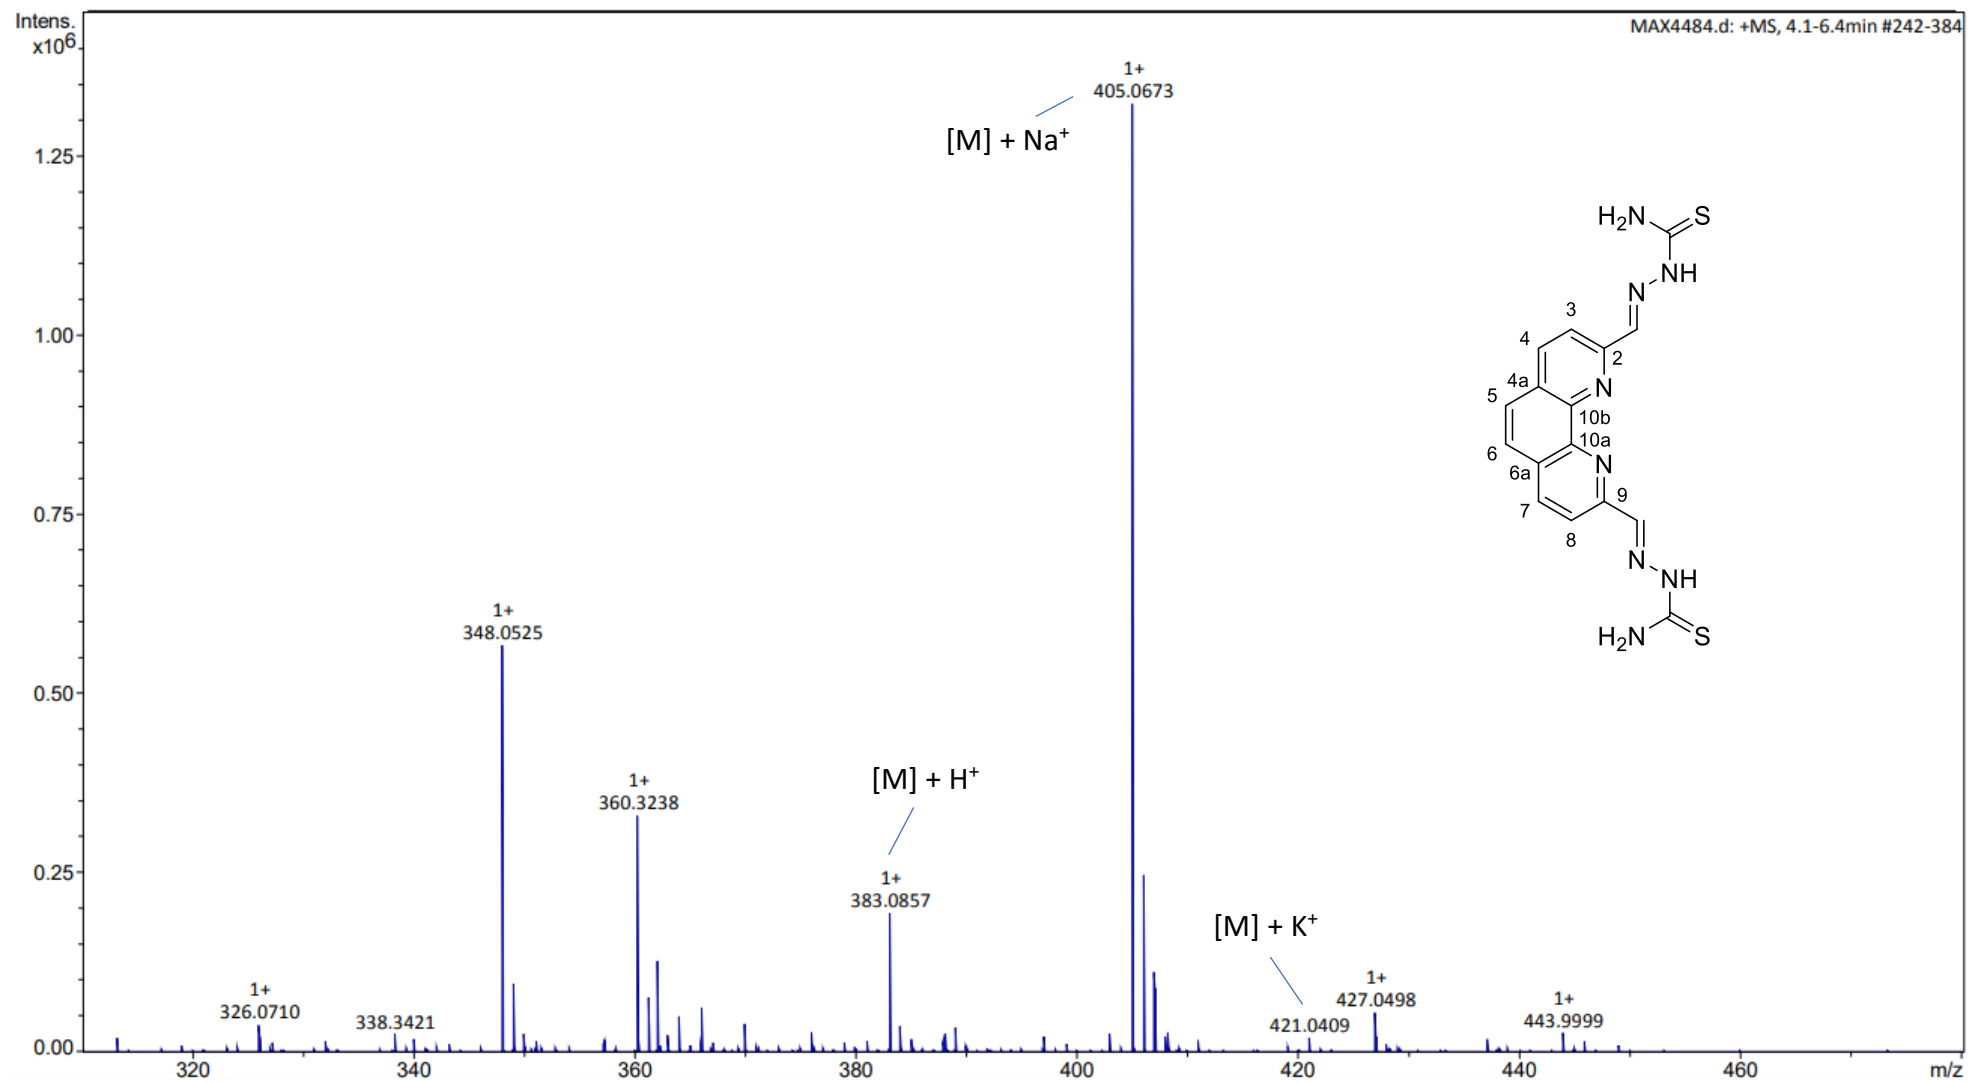

**Figure S15.** Zoomed view of high-resolution electrospray ionization mass spectrum (ESI-HRMS-pos) of **1** (MeOH, 1% formic acid)



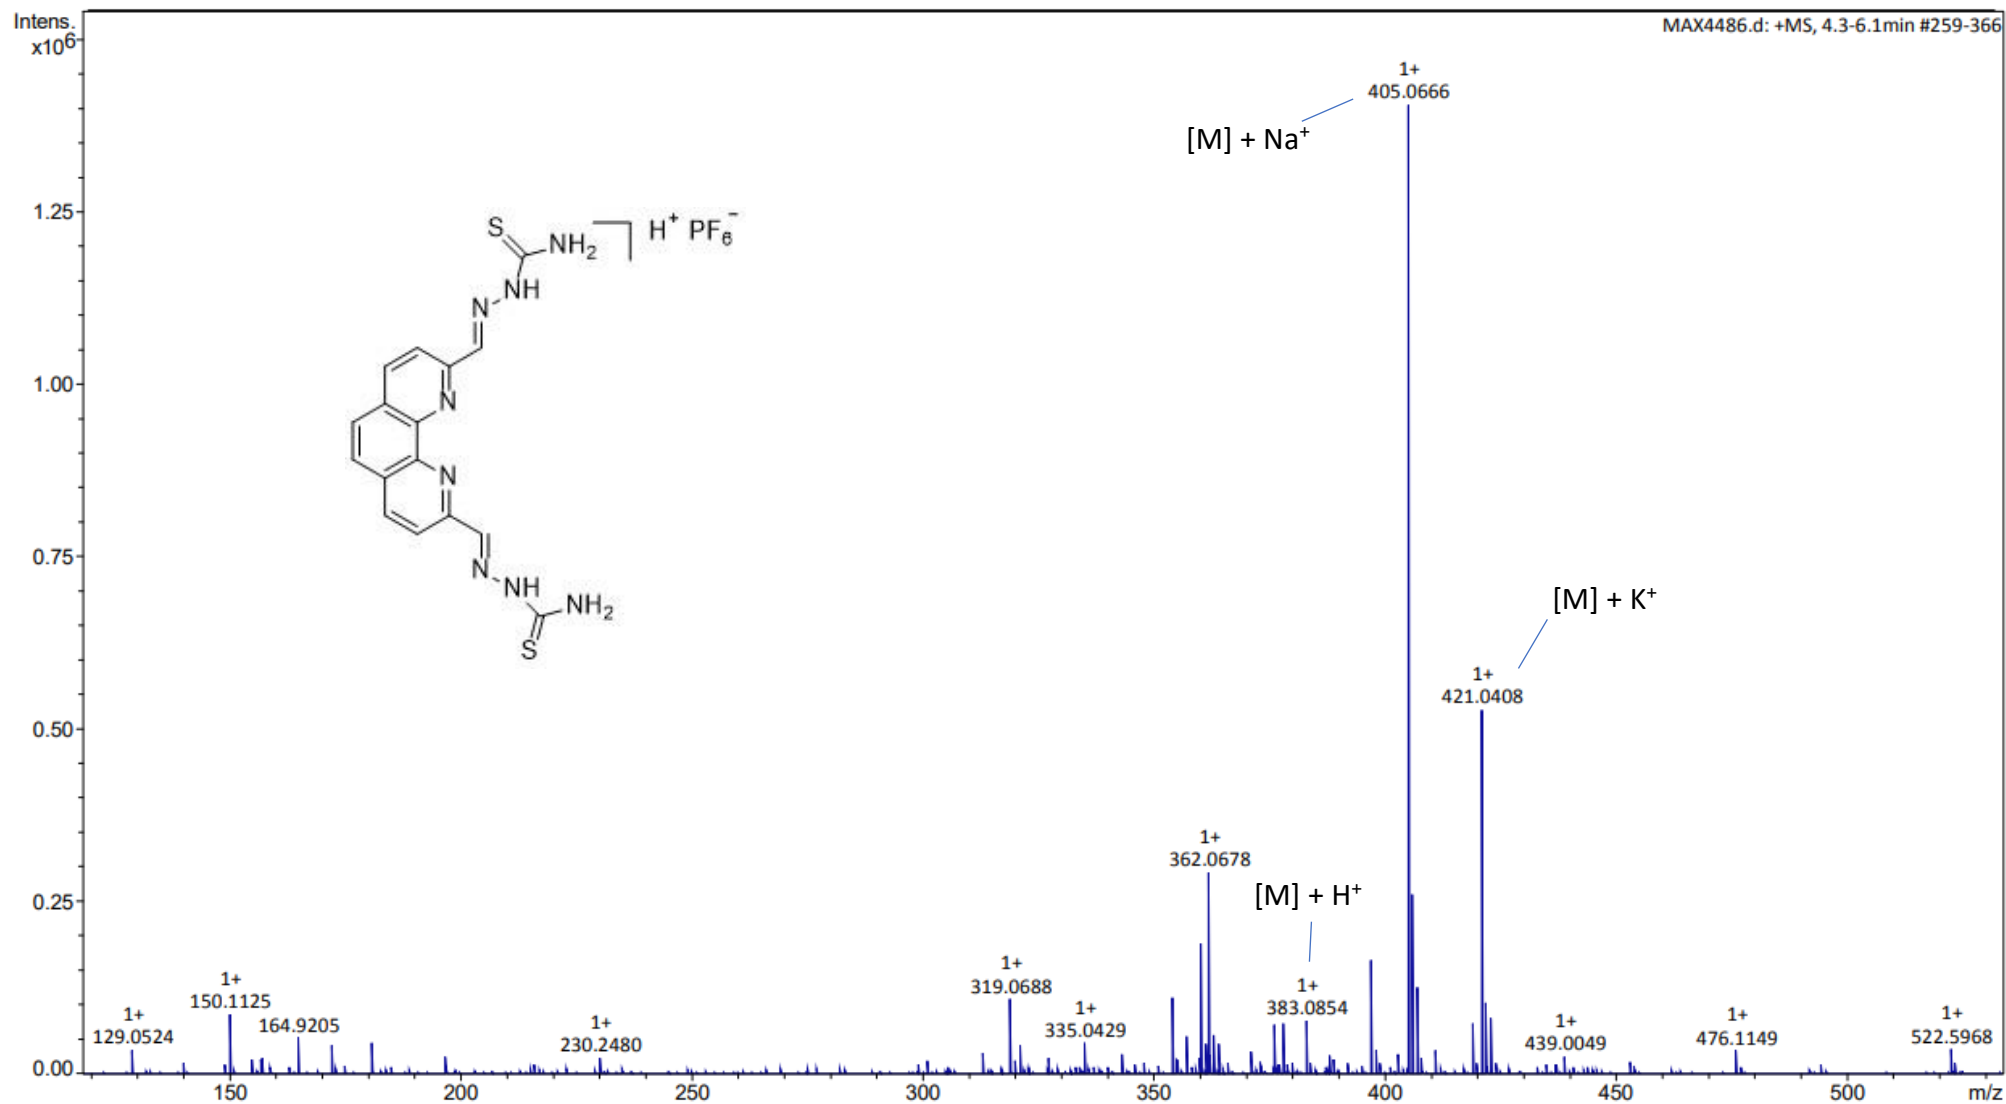

**Figure S16.** Zoomed view of high-resolution electrospray ionization mass spectrum (ESI-HRMS-pos) of **2** (MeOH, 1% formic acid)

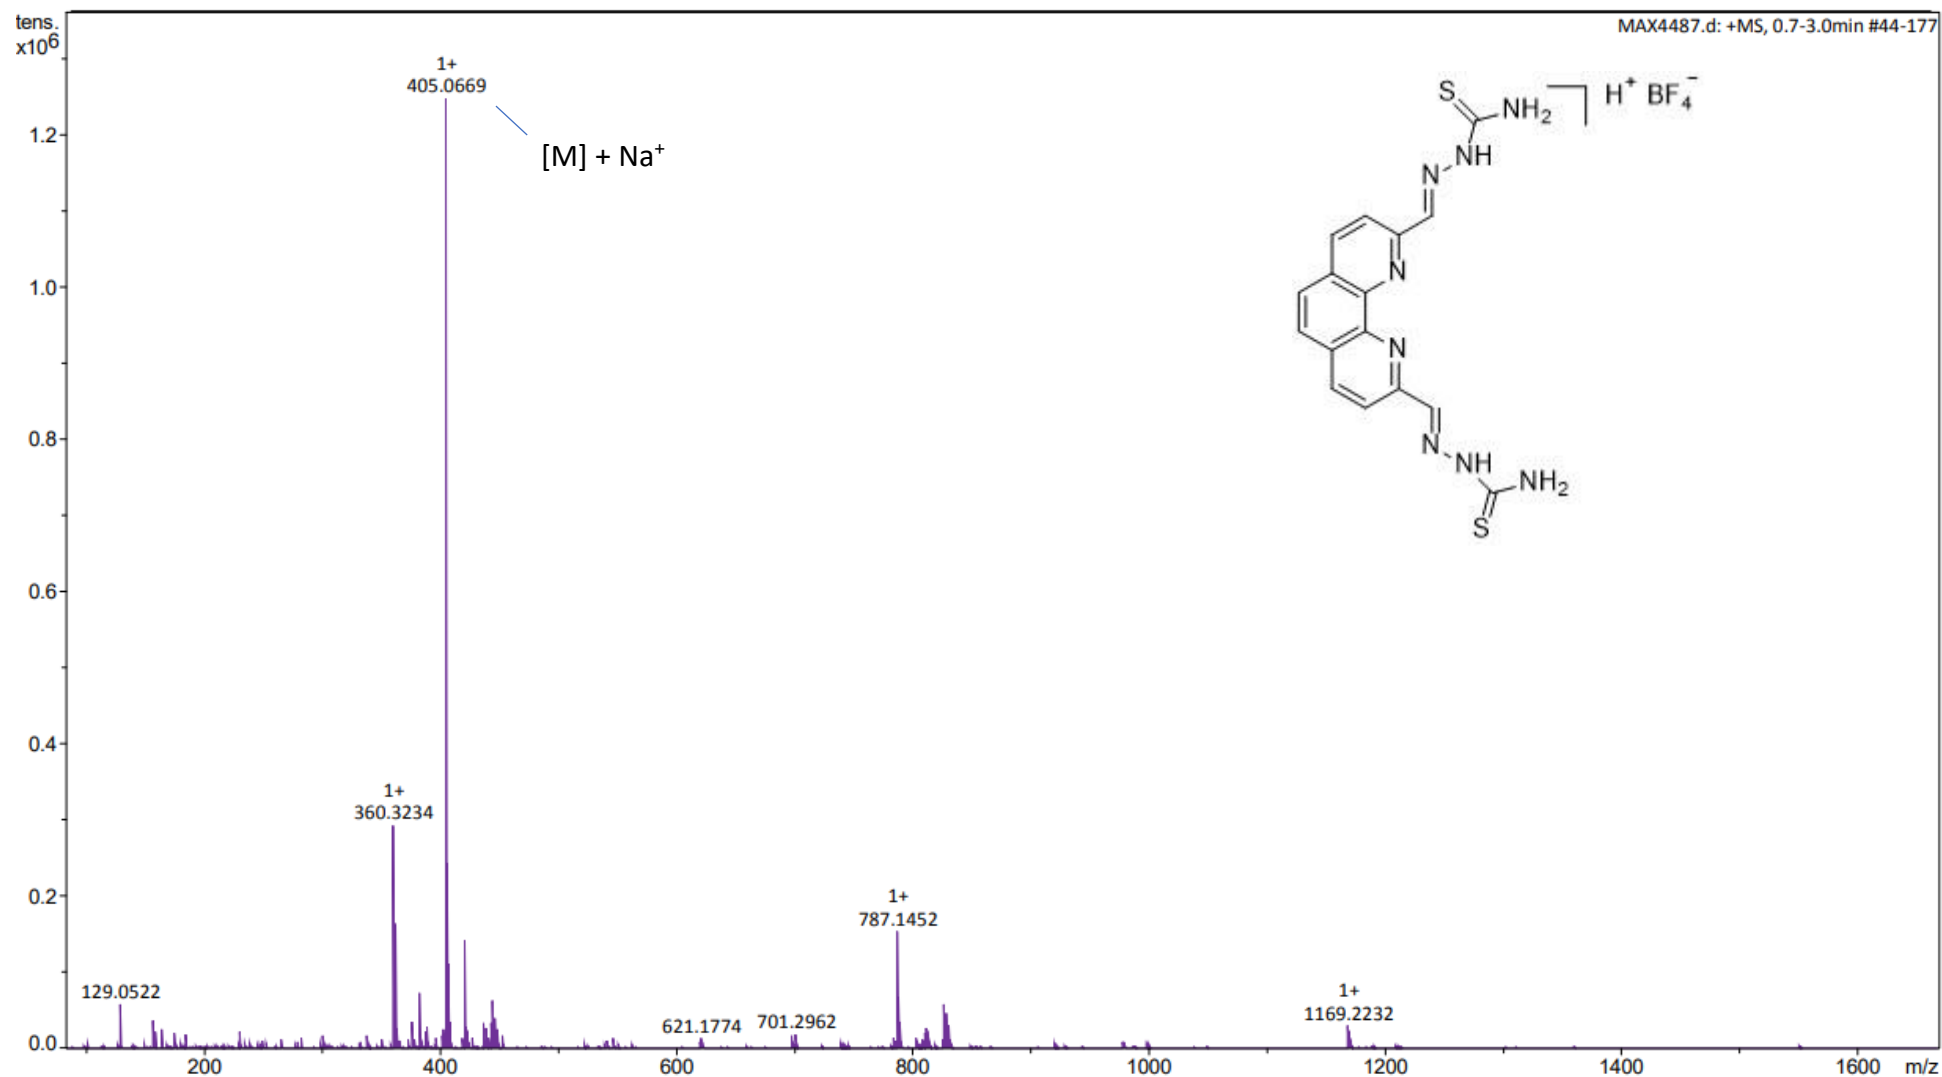

**Figure S17.** High-resolution electrospray ionization mass spectrum (ESI-HRMS-pos) of **3** (MeOH, 1% formic acid)

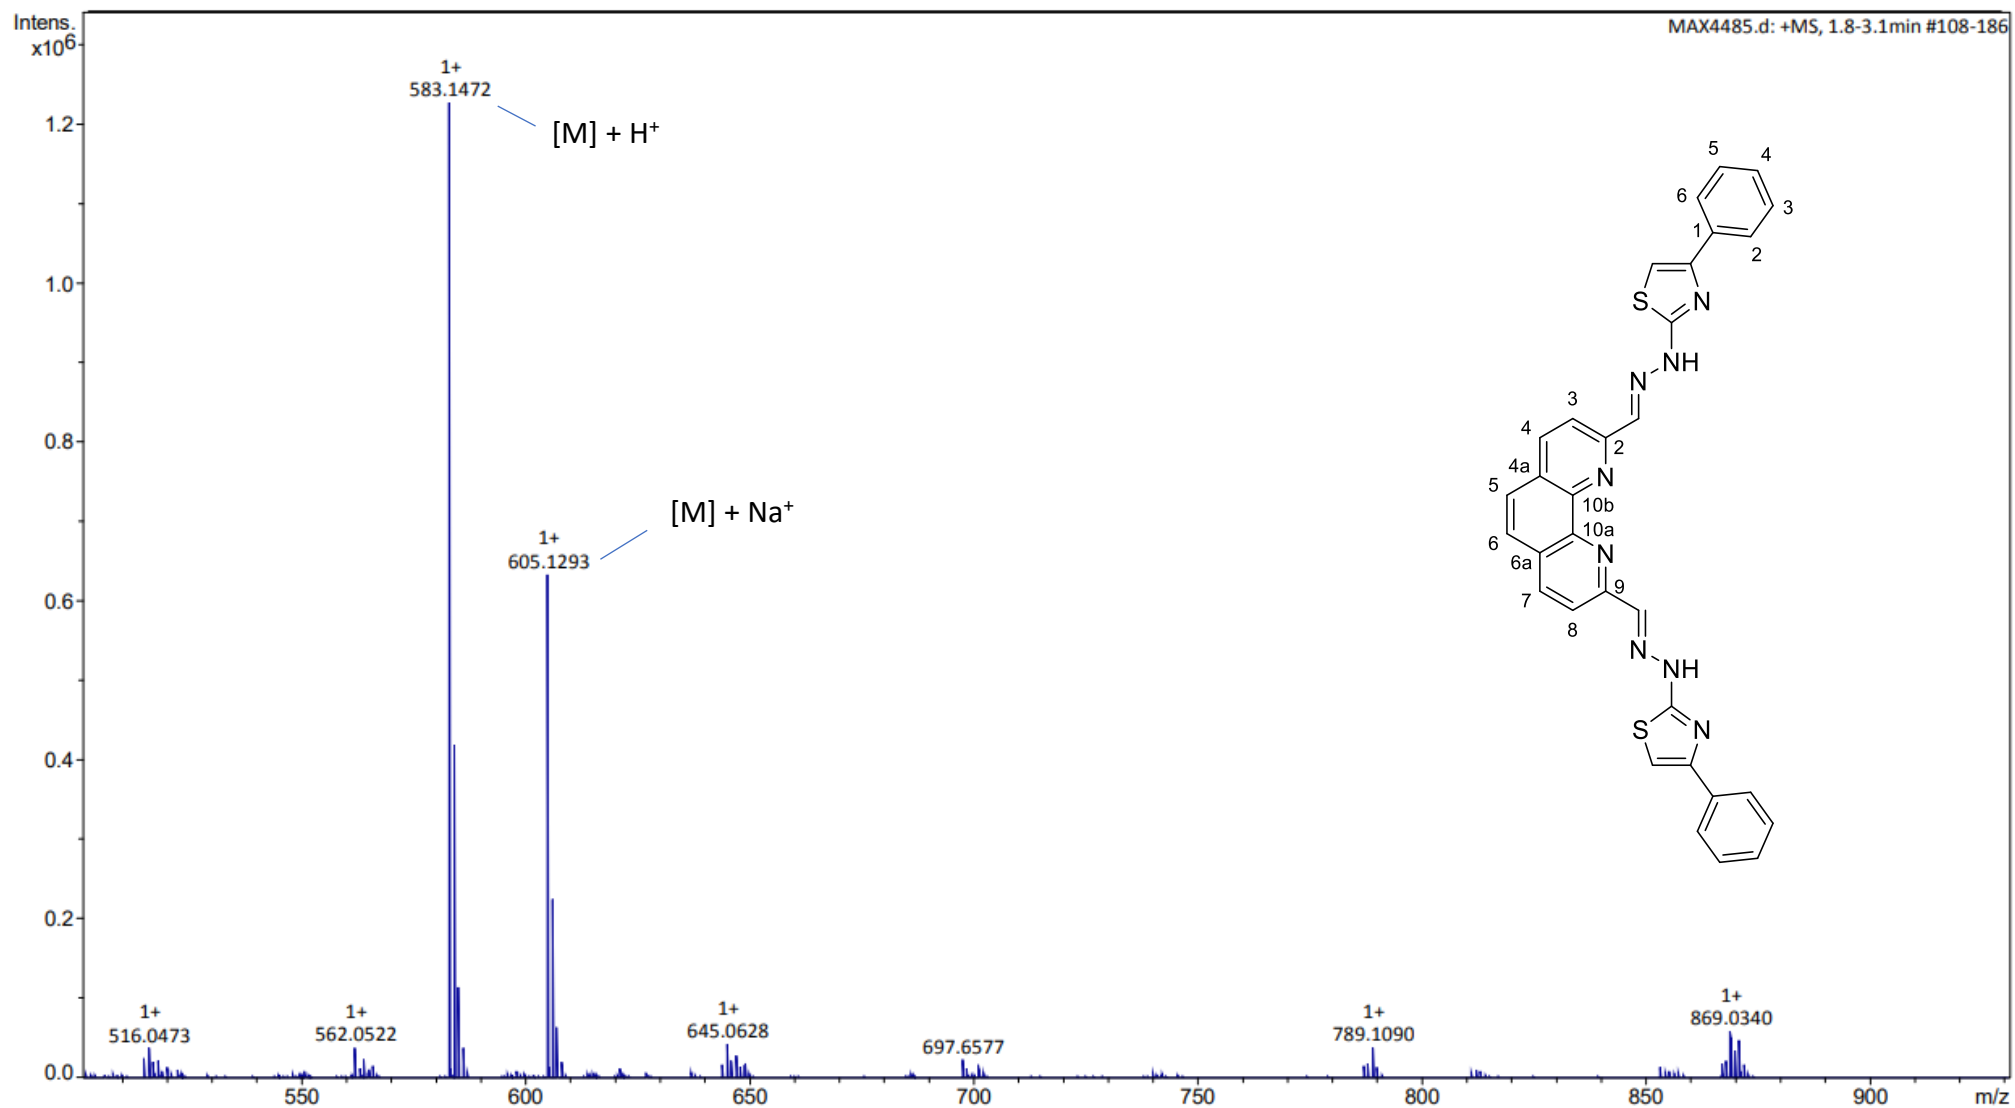

**Figure S18.** Zoomed view of high-resolution electrospray ionization mass spectrum (ESI-HRMS-pos) of **4** (MeOH, 1% formic acid)

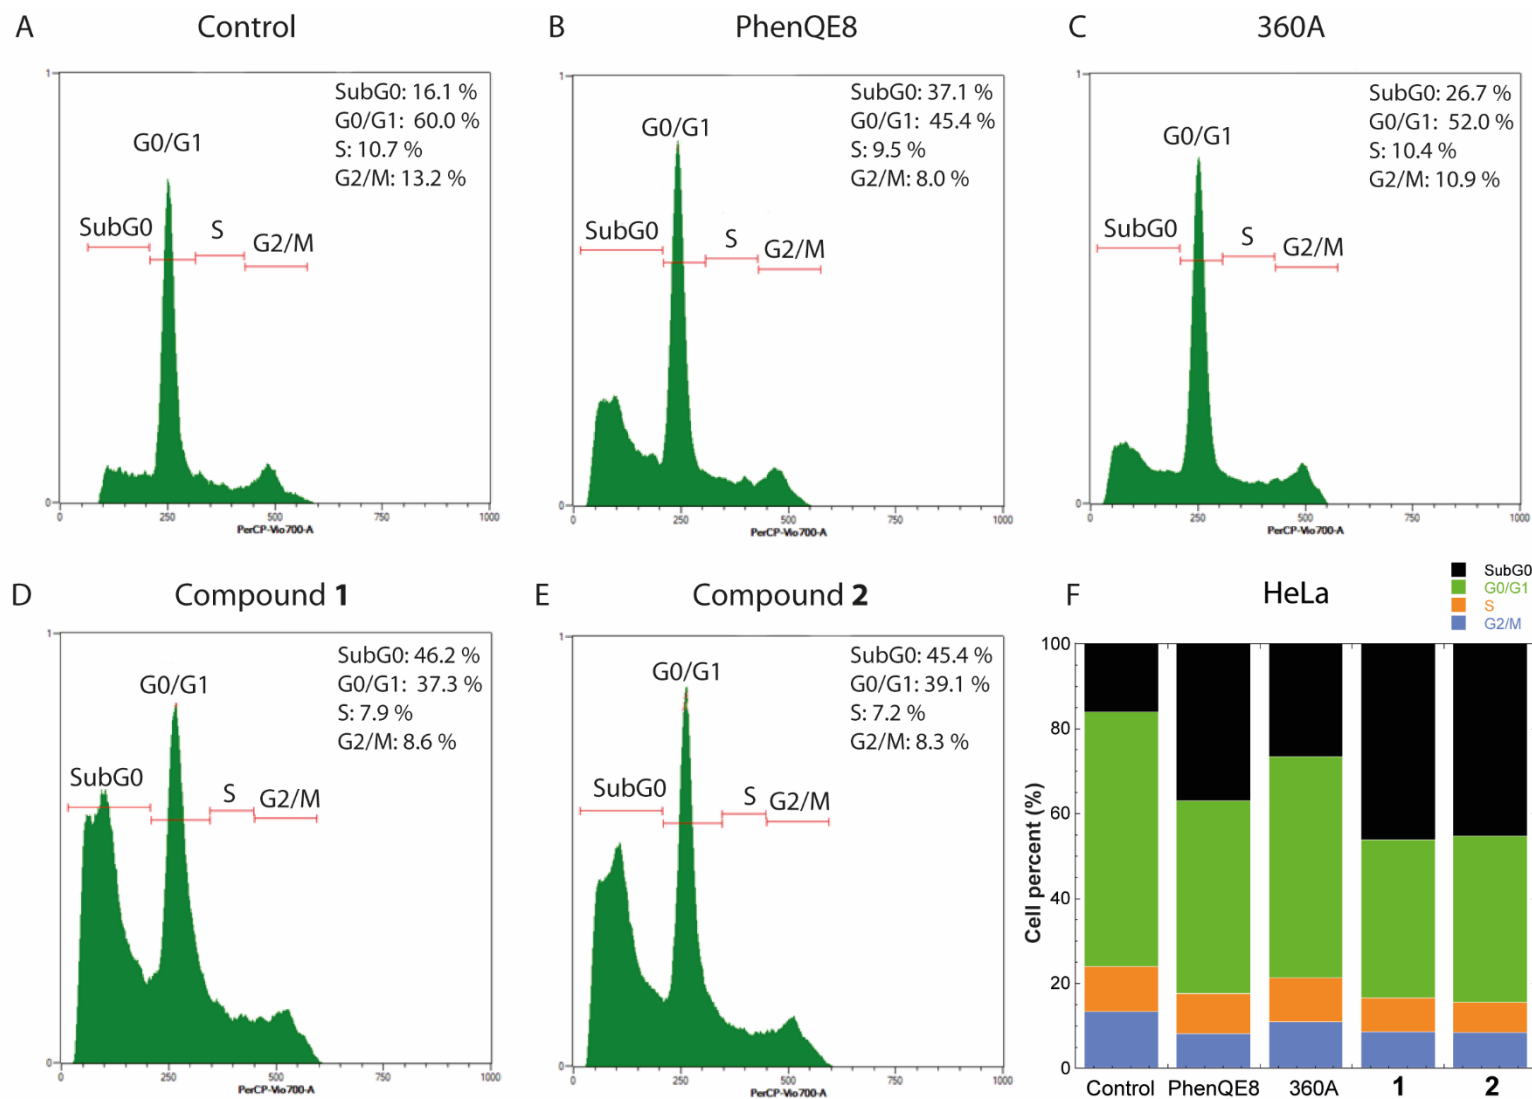

**Figure S19.** HeLa cell cycle histograms after 72 h treatment with  $\frac{1}{2}$  IC<sub>50</sub> compound concentration. A) Untreated cells (negative control); B) PhenQE8 (structural analogue with antitumor properties, positive control); C) 360A (antitumor agent, positive control); D) compound **1**; E) compound **2**, and F) Stack bar graph representing averaged cell percents in each cycle phase and SubG0 after compound treatment. Increase in the SubG0 population percent is associated to apoptosis.
